14

## Abstract

15 Serotonergic psychedelic drugs, such as psilocin (4-hydroxy-N,N-dimethyltryptamine),  
16 profoundly alter the quality of consciousness through mechanisms which are incompletely  
17 understood. Growing evidence suggests that a single psychedelic experience can positively  
18 impact long-term psychological well-being, with relevance for the treatment of psychiatric  
19 disorders, including depression. A prominent factor associated with psychiatric disorders is  
20 disturbed sleep, and the sleep-wake cycle is implicated in the regulation of neuronal firing and  
21 activity homeostasis. It remains unknown to what extent psychedelic agents directly affect sleep,  
22 in terms of both acute arousal and homeostatic sleep regulation. Here, chronic *in vivo*  
23 electrophysiological recordings were obtained in mice to track sleep-wake architecture and  
24 cortical activity after psilocin injection. Administration of psilocin led to delayed REM sleep onset  
25 and reduced NREM sleep maintenance for up to approximately 3 hours after dosing, and the acute  
26 EEG response was associated primarily with an enhanced oscillation around 4 Hz. No long-term  
27 changes in sleep-wake quantity were found. When combined with sleep deprivation, psilocin did  
28 not alter the dynamics of homeostatic sleep rebound during the subsequent recovery period, as  
29 reflected in both sleep amount and EEG slow wave activity. However, psilocin decreased the  
30 recovery rate of sleep slow wave activity following sleep deprivation in the local field potentials  
31 of electrodes targeting medial prefrontal and surrounding cortex. It is concluded that psilocin  
32 affects both global vigilance state control and local sleep homeostasis, an effect which may be  
33 relevant for its antidepressant efficacy.

34

## Introduction

35 Psilocybin is a classical serotonergic psychedelic; a unique class of drugs capable of inducing  
36 profound alterations of perception, cognition, and behaviour, commonly characterised as the  
37 psychedelic state. A growing body of evidence suggests that, under appropriately controlled  
38 conditions, acute psilocybin exposure can promote long-lasting positive effects on mood and  
39 psychological well-being, offering a promising new treatment method for affective disorders  
40 (Carhart-Harris et al., 2016; Carhart-Harris & Goodwin, 2017; Davis et al., 2020; Vollenweider &  
41 Preller, 2020).

42 Induction of the psychedelic effect by psilocybin depends on the ability of its metabolite, psilocin  
43 (4-hydroxy-N,N-dimethyltryptamine), to act as a partial agonist of 5-HT<sub>2A</sub> receptors  
44 (Vollenweider et al., 1998; Halberstadt, 2015; Madsen et al., 2019). The 5-HT<sub>2A</sub> receptor is highly  
45 expressed on the dendrites of cortical layer V pyramidal neurones, particularly in the prefrontal  
46 cortex, but is also found on inhibitory interneurons and on presynaptic thalamocortical afferents  
47 (Santana et al., 2004; Saulin et al., 2012; Celada et al., 2013; Barre et al., 2016). Broadly, at the  
48 local network level, 5-HT<sub>2A</sub> receptor agonists are observed to modulate glutamate transmission,  
49 disrupt typical modes of activity, and facilitate recurrent excitation (Beïque et al., 2007; Wood et  
50 al., 2012; Marek, 2018). At the systems level, human neuroimaging studies with psychedelics  
51 identify widespread disruptions to thalamocortical (Müller et al., 2017; Preller et al., 2018; Riga  
52 et al., 2018) and cortico-cortical connectivity, leading to alterations of classical functional  
53 connectivity networks and changes in neuronal dynamic properties (Kometer et al., 2013;  
54 Muthukumaraswamy et al., 2013; Carhart-Harris et al., 2014; Carhart-Harris, 2018; Mason et al.,  
55 2020; Preller et al., 2020). However, which observed neuronal effects are specific to, and  
56 characteristic of, the psychedelic state, remains to be further dissected (Roseman et al., 2014;  
57 Müller et al., 2020).

58 The activation of 5-HT<sub>2A</sub> receptors and induction of a psychedelic state is widely suggested to  
59 promote neuroplasticity, which is theorised to be important for psilocybin's therapeutic efficacy

60 (Vollenweider & Kometer, 2010). While evidence exists *in vitro* and in rodents that psychedelics  
61 can induce structural and functional synaptic plasticity (Berthoux et al., 2019; Ly et al., 2018),  
62 facilitate learning and memory (Catlow et al., 2013; Zhang et al., 2013; Rambousek et al., 2018)  
63 and exert long-lasting behavioural effects (Cameron et al., 2018; Hibicke et al., 2020), the specific  
64 underlying neurophysiology remains unclear, especially with regard to the treatment of  
65 psychiatric disorders in humans.

66 Neuronal plasticity processes, at both structural and functional levels, whether adaptive or  
67 homeostatic, are shaped by ongoing neuronal activity. Importantly, the brain-wide changes in  
68 neuronal dynamics which occur in association with the sleep-wake cycle are strongly implicated  
69 in the regulation of plasticity of cortical function; for example, cellular maintenance, synaptic  
70 scaling, firing rate homeostasis and systems-level memory consolidation are enabled by the sleep  
71 state (Vyazovskiy & Harris, 2013; Rasch & Born, 2013; Tononi & Cirelli, 2014; Watson et al., 2016;  
72 Levenstein et al., 2017; Pacheco et al., 2020). Alongside the circadian rhythm, the occurrence of  
73 sleep is itself regulated by a homeostatic principle; prolonged wakefulness is compensated for by  
74 increased sleep intensity, enabling an approximately constant sleep quantity to be obtained each  
75 day (Borbély et al., 2016). The brain's level of homeostatic sleep need is widely recognised to be  
76 reflected in the average levels of non-rapid eye movement (NREM) sleep slow wave activity (0.5-  
77 4 Hz) in neurophysiological field potentials (Daan et al., 1984; Achermann et al., 1993; Huber et  
78 al., 2000), such as can be observed in the electroencephalogram (EEG) or intracortical local field  
79 potential (LFP). However, slow wave amplitude and dynamics across the cortical surface reveal  
80 a heterogeneity and dependence on both behaviour and neuronal activity levels during previous  
81 wakefulness, with evidence for a bidirectional relationship between local neuronal activity and  
82 sleep-wake homeostasis (Huber et al., 2004; Rattenborg et al., 2012; Fisher et al., 2016; Thomas  
83 et al., 2020; Milinski et al., 2020).

84 Sleep disturbances and dysregulation are strongly associated with the development and  
85 maintenance of many common psychological disorders, including depression (Steiger & Kimura,

86 2010; Wulff et al., 2010; Baglioni et al., 2011; Meerlo et al., 2015). The depressed state has been  
87 theorised to be characterised by an impairment in sleep homeostasis, for example that the need  
88 for sleep increases more slowly during wakefulness and so is chronically low in depressed  
89 patients (Borbely & Wirz-Justice 1982; Wirz-Justice & Van den Hoofdakker, 1999). It is unclear  
90 whether changes in sleep architecture in depression represent simple impairments (symptoms  
91 of the disease) or instead reflect adaptive mechanisms which develop to counteract the  
92 pathophysiology of depression. The latter possibility may explain why, somewhat paradoxically,  
93 acute sleep deprivation exerts a rapid anti-depressive effect; one night of total of sleep  
94 deprivation was reported to alleviate low mood in approximately 60% of depressed patients  
95 (Wirz-Justice et al., 2005), but without additional treatments, a relapse in depressive symptoms  
96 typically occurs after subsequent sleep.

97 Currently very little is known about the effects of psychedelic substances on the regulation of  
98 sleep and there is a striking absence of literature exploring the possibility that the enduring  
99 beneficial effects of serotonergic psychedelics are sleep-dependent (Froese et al., 2018). There  
100 does exist evidence that psilocybin alters sleep in humans (Dudysová et al., 2020) however,  
101 animal models will be necessary to understand the underlying mechanisms. Elucidating the  
102 relationship between the actions of psychedelic serotonergic agonists and the regulation of sleep  
103 may yield insights into the core plasticity mechanisms involved in the aetiology of, and recovery  
104 from, disordered brain states such as depression.

105 Here, we characterise acute and enduring changes to sleep-wake-related behaviour and  
106 electrophysiology in mice following injection of psilocin, in both an undisturbed and a sleep  
107 deprived condition. We found that psilocin acutely disrupted sleep maintenance and promoted  
108 quiet wakefulness. This state was associated with altered power spectra in frontal and occipital  
109 EEG derivations and in LFPs targeted in and around the prefrontal cortex, notably including the  
110 enhancement of a 3-5 Hz rhythm and reduction in gamma band power. Despite the acute sleep  
111 disturbance, psilocin administration was not associated with long-term changes to sleep-wake

112 architecture. After 4 hours of sleep deprivation paired with psilocin exposure, no difference was  
113 observed in slow wave activity at the EEG level, however a slower rate of slow wave activity  
114 recovery was found in the LFP of psilocin injected mice.

115

## Methods

### 116 Surgical Procedures

117 Eight young adult male C57BL/6J mice (aged 14 - 20 weeks) were surgically implanted with  
118 electrodes for the continuous recording of electroencephalography (EEG) and electromyography  
119 (EMG), as well as with either a microwire array (n=4) or single-shank electrode (n=4) targeting  
120 the medial prefrontal cortex.

121 All procedures were performed under a UK Home Office Project License and conformed to the  
122 Animals (Scientific Procedures) Act 1986. Surgeries were performed under isoflurane  
123 anaesthesia (4% induction, 1 - 2% maintenance). Analgesics were administered immediately  
124 before surgery (5 mg/kg metacam and 0.1 mg/kg vetergesic, subcutaneous) and for at least three  
125 days following surgery (metacam, oral). In addition, an immunosuppressant was given both the  
126 day before surgery (0.2 mg/kg dexamethasone, intraperitoneal) and immediately before surgery  
127 (0.2 mg/kg dexamethasone, subcutaneous).

128 Custom-made head stages for the recording of EEG and EMG were constructed in advance of each  
129 surgery which comprised three EEG bone screws and two stainless steel EMG wires, soldered to  
130 an 8-pin surface mount connector (Pinnacle Technologies Inc., Kansas, USA). The EEG screw  
131 electrodes were inserted into holes drilled into the skull (0.7 mm drill bit, InterFocus Ltd.,  
132 Cambridge, UK). One EEG screw was located above the right frontal cortex (primary motor area:  
133 anteroposterior 2 mm, mediolateral 2 mm), one above the right occipital cortex (primary visual  
134 area: anteroposterior 3.5 mm, mediolateral 2.5 mm), and one above the left cerebellum, which  
135 served as the reference signal. The two EMG wires were inserted into left and right nuchal muscle.  
136 An additional screw was located above the left occipital cortex, which served as a ground for the  
137 intracortical electrodes.

138 Four animals were implanted with a single-shank probe in left anterior medial cortex, aiming to  
139 span cingulate, prelimbic and infralimbic cortex (anteroposterior 1.7 mm, mediolateral 0.25 mm,

140 depth 2 mm). The probe comprised a 5 mm shank containing 16 iridium electrode sites of 30  $\mu$ m  
141 diameter, regularly spaced 50  $\mu$ m apart and extending up to 800  $\mu$ m from the probe's tip (A1x16-  
142 5mm-50-703, NeuroNexus, Michigan, USA). The remaining four animals were implanted with a  
143 custom-designed polyimide-insulated tungsten microwire array (Tucker-Davis Technologies Inc.,  
144 Florida, USA), spanning a larger area of left anterior medial cortex (centred anteroposterior 2.23  
145 mm, mediolateral 0.75 mm, depth 2.2 mm, rotation 10 degrees). The array comprised 16 wire  
146 channels of 33  $\mu$ m diameter arranged in 2 rows of 8, with row separation 375  $\mu$ m, columnar  
147 separation 250  $\mu$ m, and tip angle 45 degrees. Each wire was a custom-specified length for precise  
148 targeting of prefrontal regions (lateral row from anterior to posterior: 3.2 mm, 3.5 mm, 3.5 mm,  
149 3.8 mm, 3.8 mm, 4 mm, 4 mm, 4 mm; medial row from anterior to posterior: 2.5 mm, 2.8 mm, 3  
150 mm, 3.2 mm, 3.2 mm, 3.5 mm, 3.5 mm, 3.5 mm). For the single-shank probe, an additional hole  
151 was drilled to the size of the probe. For the arrays, a 1 x 2.25 mm craniotomy window was drilled  
152 into the skull. Once the array/probe was implanted, a silicone gel (KwikSil, World Precision  
153 Instruments, Florida, USA) was applied to seal the craniotomy and protect the exposed brain.  
154 Dental acrylic was used to stabilise the implanted electrodes (Super Bond, Prestige Dental,  
155 Bradford, UK) and to protect the exposed wires (Simplex Rapid, Kemdent, Swindon, UK).

## 156 **Animal Husbandry**

157 Following surgery, mice were housed in separate individually ventilated cages and their recovery  
158 was closely monitored. The weight, spontaneous behaviour, provoked behaviour, respiration rate  
159 and grimace of each mouse was scored daily, until the mice reached baseline level for three  
160 consecutive days. Following recovery, the animals were rehoused in individual custom-made  
161 transparent plexiglass cages (20.3 x 32 x 35 cm), placed inside ventilated sound-attenuated  
162 Faraday chambers (Campden Instruments, Loughborough, UK). A camera was mounted inside  
163 each chamber and video was recorded continuously during the light period. EEG and EMG head  
164 stages were connected to the recording equipment using custom-made cables, and both LFP  
165 probe types were connected using spring-wrapped Zif-clip head stages (Tucker-Davis



166 Technologies Inc., Florida, USA). Mice were habituated to their cables for three days before the  
167 first baseline recording began. The recording room was kept on a 12 - 12 hour light-dark cycle  
168 (lights on at 9 am), at  $22 \pm 1$  °C and  $50 \pm 20$  % humidity. Food and water were provided *ad libitum*  
169 throughout.

## 170 **Experimental Design**

171 Once fully recovered from surgery, each batch of animals underwent four injection experiments,  
172 comprising all combinations of two sleep-wake conditions and two drug treatments. In one sleep-  
173 wake condition, mice were immediately returned to their home cage after injection and left  
174 undisturbed. In the second condition, a sleep deprivation protocol was enforced for four hours  
175 after injection. A within-subjects design was employed such that each mouse experienced all  
176 combinations of psilocin vs. vehicle and undisturbed vs. sleep deprivation conditions exactly  
177 once. The order of drug treatments and sleep-wake conditions was counterbalanced across all  
178 eight animals. Each injection experiment was separated by three days, following a pattern of  
179 baseline day, injection day, and recovery day.

## 180 **Preparation of Psilocin**

181 Psilocin (4-hydroxy-N,N-dimethyltryptamine, LGC Standards) was administered by  
182 intraperitoneal injection at a dose of 2 mg/kg. Crystalline psilocin was dissolved in 50 mM tartaric  
183 acid and subsequently diluted in saline (5% glucose) up to a concentration of 0.25 mg/ml.

## 184 **Sleep Deprivation**

185 Sleep deprivation was performed using the well-established gentle handling procedure (Fisher  
186 et al., 2016). During this period, experimenters constantly monitored both the behaviour and  
187 ongoing neurophysiological recordings of the mice. As soon as any animal showed signs of  
188 sleepiness (such as immobility, or slow waves in the EEG), novel objects were introduced to the  
189 cage (such as cardboard, colourful plastic, sponge, tin foil, wooden blocks and plastic wrap) in  
190 order to encourage wakefulness. In some cases, towards the end of the sleep deprivation period,

191 the mice stopped responding to novel objects and were awakened instead by gentle physical  
192 stimulation (brushing with tissue paper or disturbance of their nest), although this was kept to a  
193 minimum. Sleep deprivation lasted 4 hours.

#### 194 **Data Acquisition**

195 Electrophysiological signals were acquired using a multichannel neurophysiology recording  
196 system (Tucker-Davis Technologies Inc., Florida, USA). Signals were managed and processed  
197 online using the software package Synapse (Tucker-Davis Technologies Inc., Florida, USA). All  
198 signals were amplified (PZ5 NeuroDigitizer preamplifier, Tucker-Davis Technologies Inc., Florida,  
199 USA), filtered online (0.1 – 128 Hz) and stored with a sampling rate of 305 Hz. In addition, the  
200 raw LFP signal was processed to extract extracellular multi-unit spiking. The signal was filtered  
201 (300 Hz – 1 kHz) and an amplitude threshold was manually selected for each channel to detect  
202 the occurrence of spikes. When threshold crossing occurred the time stamp and signal snippets  
203 (46 samples at 25 kHz, 0.48 ms before and 1.36 ms after threshold crossing) were stored.

204 Signals were read from tank formats into Matlab (using the software package *TDTMatlabSDK*)  
205 and filtered with a zero-phase 4<sup>th</sup> order Butterworth filter (using Matlab functions *butter* and  
206 *filtfilt*) between 0.5 - 100 Hz for EEG/LFP signals and between 10 – 45 Hz for EMG, then resampled  
207 at 256 Hz (using the Matlab function *resample*). Spiking activity from each channel was first  
208 cleaned offline for artefacts using the Matlab spike sorting software *Wave\_clus* (Quiroga et al.,  
209 2004). Although this software outputs putative sorted single units, very few separable clusters  
210 were typically found (often only one) and these were not of high quality (many inter-spike  
211 intervals below 3 ms refractory period), so unit clusters were merged and treated as multi-unit  
212 activity. However, the software was very useful for identifying waveforms which were not spike-  
213 like and were therefore discarded as electrical artefacts. Firing rate was calculated in epochs of 4  
214 seconds separately for each channel. For some analyses, spike rates were normalised by  
215 expression as a percentage of the mean spike rate within the same channel and same vigilance

216 state on the baseline day before psilocin injection in the relevant condition. Normalised spike  
217 rates could then be averaged across channels.

## 218 **Sleep Scoring**

219 Vigilance states were scored manually by visual inspection at a resolution of 4 seconds using the  
220 software SleepSign (Kissei Comtec, Nagano, Japan). Wake was characterised by low amplitude  
221 irregular EEG and LFP signals alongside asynchronous high frequency multi-unit spiking. In  
222 contrast, NREM sleep was identifiable by the presence of high amplitude EEG and LFP slow waves  
223 coincident with synchronous spiking multi-unit off periods. REM sleep periods were identifiable  
224 by a reduced slow wave activity, increased theta power and readily distinguishable from waking  
225 by low EMG levels and sleep-wake context (Figure 1). In order to identify and exclude time  
226 periods with large amplitude artefactual deflections across LFP channels, a hybrid LFP signal was  
227 created comprising the maximum absolute value of any one LFP at each time point and plotted  
228 alongside EEG for manual artefact scoring.

## 229 **Histology**

230 When all experimental recordings were complete the animals were euthanised and their brains  
231 were prepared for histological analysis for location of inserted probes. A microlesion protocol  
232 was applied immediately after death using a NanoZ stimulation device (White Matter LLC, Seattle,  
233 USA). Four channels (chosen to be as equally spaced across the area covered by the probe as  
234 possible) were sequentially stimulated with 10  $\mu$ A of current for 20 seconds. Animals underwent  
235 transcardial perfusion with paraformaldehyde (PFA, 4%) and extracted brains were suspended  
236 in PFA for 24 - 48 hours before being stored in PBS (with sodium azide). Brains were sectioned  
237 into 50  $\mu$ m coronal slices using a freezing microtome and stained with DAPI, a DNA binding  
238 fluorophore. Probes were stained before insertion with DiI. The slices were imaged using an  
239 Olympus FV1000 confocal microscope and compared with an anatomical atlas (Paxinos &  
240 Franklin, 2013) to aid localisation of probes.

241 Histology was only fully successful in four animals (two single shank and two array implanted).  
242 Based on the analysed subset, the estimated distribution of targeted cortical regions was  
243 approximately prelimbic (39%), cingulate (31%), secondary motor (12 %), medial orbital (10%)  
244 and infralimbic (8%). Histological analysis of the remaining animals suggested that some  
245 electrodes may have reached deeper and more posterior structures including the dorsal striatum  
246 and lateral septal nucleus, however this could not be definitively confirmed. For analysis, all  
247 quality LFP signals were grouped and treated as one population.

### 248 **Data Inclusion/Exclusion**

249 Out of the 8 animals in the study, frontal EEG recordings were successfully obtained from 7,  
250 occipital EEG from 5, LFP from 6 and multi-unit spiking activity from 7. Lost signals were due to  
251 damage to the electrode or connecting wires. All signals were obtained simultaneously from 5  
252 animals. All individual LFP signals were manually examined and a total of 15 (out of 112) were  
253 identified for exclusion based on the presence of frequent high amplitude artifacts or  
254 unsystematic drift in signal amplitude during key analysis time windows.

### 255 **Field Potential Spectral Analysis**

256 The spectral properties of EEG and LFP signals were analysed with a discrete fast Fourier  
257 transform (FFT) on segments of 4-second duration, applying a Hann window. Spectral power  
258 values were averaged over epochs scored as the same vigilance state within the time window of  
259 interest separately for each animal. An average power for each discrete frequency value in wake,  
260 NREM and REM sleep was calculated for each animal from the whole 24-hour baseline day before  
261 psilocin injection. For plotting spectra, values between 45 - 55 Hz were interpolated for ease of  
262 visualisation, since power in this frequency range was removed by a notch filter targeting 50 Hz  
263 line noise. When specifically analysing slow wave activity, this was obtained for each epoch by  
264 summing power over frequencies from 0.5 - 4 Hz obtained from the FFT.

### 265 **Statistics**

266 Statistical tests were all performed using Matlab. ANOVA was performed using the Matlab  
267 function *anova2* and paired samples t-tests were conducted using the Matlab function *ttest*, after  
268 confirming that data pass a Lillie's test for normality (function *lilliestest*) and in some cases,  
269 where indicated, tests were run after applying a log transform to improve data normality. A  
270 Wilcoxon test was performed (function *ranksum*) for highly skewed data. When testing for  
271 differences between power spectra t-tests were run at all individual discrete frequency values,  
272 applying a  $p < 0.05$  significance threshold without correction for multiple comparisons.

273

## Results

274 In this study 8 mice were injected with either 2 mg/kg psilocin (4-hydroxy-N,N-  
275 dimethyltryptamine) or vehicle while EEG, cortical LFPs and neuronal activity were continuously  
276 monitored over a period of 11 days, comprising 4 injection experiments. The within-subject  
277 design incorporated two sleep-wake conditions (undisturbed vs. sleep deprivation) and two  
278 treatments (drug vs. vehicle).

### 279 **Sleep is acutely destabilised and fragmented after psilocin**

280 In the first condition, the mice were left undisturbed in their home cage after injection, in order  
281 to study arousal and spontaneous sleep-wake behaviour. The injection was administered shortly  
282 after light onset, at which time the animals are typically asleep. The animals were, of course,  
283 necessarily awakened by the intraperitoneal injection procedure. The most striking effect of the  
284 psilocin was to disrupt the animals' first attempts at initiating sleep. When affected by the drug,  
285 the mice spent a significant amount of time in their nests, adopting a posture compatible with  
286 sleep, but still apparently awake according to electrophysiological criteria. Rest in these psilocin-  
287 affected animals was frequently disturbed by small body movements, such as stretches and  
288 readjustments of posture, and often the eyes remained open even while motionless  
289 (Supplementary Video 1).

290 Psilocin injection did not change the essential features of electrophysiological signals in wake,  
291 NREM or REM sleep in a way that was immediately visually identifiable (Figure 1), and it was  
292 therefore possible to score sleep-wake episodes in both vehicle and psilocin-treated animals.  
293 Analysis of this period using electrophysiological criteria for sleep-wake definition suggested that  
294 the psilocin-injected animals were rapidly alternating between short wake and shallow NREM  
295 sleep episodes (Figure 2A, 2B). The average latency from the time of injection to the first 4-second  
296 epoch scored as NREM sleep, based on electrophysiological criteria, was  $18.6 \pm 6.1$  minutes in the  
297 vehicle condition and  $26.3 \pm 4.5$  minutes in the psilocin animals, which was not significantly  
298 different between conditions ( $p = 0.30$ ,  $n = 8$ , paired t-test, Figure 2C). However, the mean latency

299 to the first NREM sleep episode, defined as continuous NREM sleep of at least 1-minute duration,  
300 was  $25.7 \pm 5.4$  minutes in vehicle animals compared to  $43.4 \pm 3.7$  minutes in animals injected with  
301 psilocin, which was a significant difference ( $p = 0.015$ ,  $n = 8$ , paired t-test, Figure 2D). Similarly,  
302 the latency to the initiation of any REM sleep was also increased by psilocin, from an average of  
303  $44.5 \pm 5.1$  minutes in vehicle condition to  $74.6 \pm 6.1$  minutes in the psilocin condition ( $p = 0.013$ ,  
304  $n = 8$ , paired t-test, Figure 2E).

305 Alterations to sleep-wake activity in the psilocin-treated animals were observed to be greatest  
306 during the first hour after injection but could last up to approximately 3 hours, and so this time  
307 window was analysed further. Over the 3 hours following injection, psilocin increased the average  
308 proportion of time spent awake (Vehicle:  $30.8 \pm 2.0\%$ , Psilocin:  $44.3 \pm 3.4\%$ ,  $p = 6.8 \times 10^{-4}$ ,  $n = 8$ ,  
309 paired t-test), and correspondingly significantly decreased the time spent in NREM (Vehicle:  $59.7$   
310  $\pm 1.7\%$ , Psilocin:  $50.6 \pm 2.9\%$ ,  $p = 0.0011$ ,  $n = 8$ , paired t-test), and REM sleep (Vehicle:  $9.4 \pm 0.5\%$ ,  
311 Psilocin:  $5.1 \pm 0.8\%$ ,  $p = 0.0012$ ,  $n = 8$ , paired t-test, Figure 2F). However, during this 3-hour period  
312 after injection, the mean duration of continuous wake episodes was unchanged (Vehicle:  $28.8 \pm$   
313  $4.5$  secs, Psilocin:  $29.8 \pm 3.1$  secs,  $p = 0.89$ , paired t-test), whereas episode duration was  
314 significantly reduced for both NREM (Vehicle:  $93.6 \pm 12.9$  seconds, Psilocin:  $50.0 \pm 2.6$  seconds,  $p$   
315  $= 0.0070$  paired t-test) and REM sleep (Vehicle:  $67.7 \pm 7.0$  secs, Psilocin:  $47.6 \pm 5.1$  seconds,  $p =$   
316  $0.019$ , Figure 2G). This form of sleep disruption resembles an increased propensity for brief  
317 awakenings, usually defined in mice as periods of wakefulness lasting  $\leq 20$  seconds occurring  
318 during NREM sleep and typically accompanied by small body movements. During the first hour  
319 following injection, the frequency of brief awakenings per minute of NREM sleep was increased  
320 by psilocin (Vehicle:  $0.60 \pm 0.32$ ; Psilocin:  $1.4 \pm 0.48$ ;  $p = 2.0 \times 10^{-5}$ ,  $n = 8$ , paired t-test, Figure 2H).  
321 These results suggest that the increased wakefulness produced by psilocin is due to an increased  
322 drive to awaken from sleep, corresponding to an impairment of sleep maintenance rather than  
323 an enhanced stability of wakefulness.

324 This period of rapidly alternating wake and NREM sleep is further illustrated in Figures 2I and 2J,  
325 showing a time-frequency plot for the frontal EEG spectral power (relative to the baseline day),  
326 from one representative example animal after both vehicle and psilocin administration. In the  
327 vehicle condition, clear vigilance state boundaries are visible in the spectrogram (Figure 2I),  
328 including wake periods with heterogenous spectral composition, NREM sleep with increased low  
329 frequency (< 30 Hz) and decreased high frequency power (> 30Hz) and REM sleep characterised  
330 by reduced low frequency (< 6 Hz) and elevated upper theta (7 – 10 Hz) power. In contrast, in the  
331 psilocin condition, the wake to sleep transition was less distinct (Figure 2J). In this example,  
332 psilocin injection is followed by approximately 10 minutes of active wakefulness characterised  
333 by elevated theta (5 – 9 Hz) and upper gamma (> 50 Hz) power. Subsequently, a quiet wake period  
334 occurs containing frequent NREM sleep attempts but dominated by wakefulness, generally  
335 characterised by reduced low frequency power (< 30 Hz) and elevated power in a narrow band  
336 around approximately 4 Hz. Approximately 35 minutes post-injection, consolidated NREM sleep  
337 becomes more distinct, indicated by increased low frequency (< 30 Hz) and decreased high  
338 frequency power (> 30Hz), although frequent brief awakenings persist. Note no REM sleep  
339 occurred in this example.

#### 340 **Long-term sleep-wake architecture is unaffected by psilocin**

341 The hour-by-hour distribution of wake, NREM and REM sleep averaged over animals for 24 hours  
342 after injection is shown in Figures 3A-C. A clear light-dark cycle is evident, in which animals are  
343 awake more throughout the dark phase, particularly during its first half (beginning between 11  
344 and 12 hours after injection). Overall, there is no striking change in sleep-wake architecture due  
345 to psilocin on this time scale, except for the increase in wake and suppression of sleep, particularly  
346 REM sleep, in the first few hours. Importantly, there is no specific time point following the acute  
347 disruption of sleep at which a rebound in NREM or REM sleep is evident. To visualise the  
348 restoration of vigilance state homeostasis, the percentage of time since injection in each state was  
349 plotted as a function of time since injection over 24 hrs. These cumulative time courses of wake,



350 NREM and REM sleep (Figure 3D-F) suggest that homeostasis of vigilance state quantity is  
351 restored within one day, as wake and NREM sleep quantities are no longer significantly different  
352 between drug conditions after 5 or 6 hours, and REM sleep after 12 hours.

353 Visually noticeable sleep-wake changes lasted up to three hours after injection, but from three  
354 hours after injection until the end of the light period, the total fraction of time spent in each  
355 vigilance state was not significantly different between psilocin and vehicle conditions (Wake:  $p =$   
356  $0.25$ , NREM:  $p = 0.24$ , REM:  $p = 0.42$ ,  $n = 8$ , paired t-test, Figure 3G). Additionally, the average  
357 duration of wake, NREM and REM sleep episodes was unchanged (Wake:  $p = 0.79$ , NREM:  $p =$   
358  $0.13$ , REM:  $p = 0.13$ ,  $n = 8$ , paired t-test) (Figure 3H). Similarly, the quantity of wake, NREM and  
359 REM sleep was not different in the dark period after injection (Wake:  $p = 0.50$ , NREM:  $p = 0.92$ ,  
360 REM:  $p = 0.07$ ,  $n = 4$ , paired t-test).

### 361 **Psilocin affects the sleep homeostatic process in a region-specific manner**

362 The sleep-wake history of an individual is tracked by physiological processes in the brain in order  
363 to homeostatically regulate global vigilance states, such that, for example, sleep deprivation is  
364 compensated by increased subsequent sleep duration and intensity. This phenomenon is termed  
365 “Process S”, and with an underlying biological substrate that is not completely certain, measures  
366 the magnitude of the homeostatic drive to sleep, and can predict with high accuracy EEG slow  
367 wave activity through mathematical models (Daan et al., 1984; Achermann et al., 1993;  
368 Guillemin et al., 2018; Thomas et al., 2020).

369 Given the pronounced acute effects of psilocin on sleep-wake states observed in the first  
370 experiment, we hypothesised that the sleep homeostatic process (Process S) would also be  
371 affected. To explore this and address the confound of psilocin’s acute direct effects on arousal, in  
372 the second experimental condition, mice were injected as before at light onset with either 2  
373 mg/kg psilocin or vehicle, and immediately kept awake for 4 hours by engaging the animals with  
374 presentation of novel objects. We aimed to determine whether sleep quantity or slow wave  
375 activity levels would differ in subsequent recovery sleep between drug and vehicle conditions.

376 Overall, the electrophysiological signals during recovery sleep were similar between vehicle and  
377 psilocin conditions and the expected increased slow wave activity indicating elevated Process S  
378 was consistently observed during NREM sleep after sleep deprivation (Figure 4A, 4B). After 4  
379 hours of sleep deprivation the median latency to the initiation of NREM sleep was not significantly  
380 different between psilocin and vehicle groups (Vehicle: 2.1 min, Psilocin: 2.2 min,  $p = 0.84$ ,  $n = 8$ ,  
381 Wilcoxon signed rank test, Figure 4C). There was an effect of time, but not of drug condition or  
382 interaction, on hourly sleep quantities throughout the remainder of the light period, for both  
383 NREM (Drug:  $F_{(1,210)} = 0.28$ ,  $p = 0.60$ ; Time:  $F_{(14,210)} = 6.11$ ,  $p < 0.001$ ; Interaction:  $F_{(14,210)} = 0.89$ ,  $p$   
384  $= 0.57$ ; two-way ANOVA) and REM sleep (Drug:  $F_{(1,210)} = 0.15$ ,  $p = 0.70$ ; Time:  $F_{(14,210)} = 2.16$ ,  $p =$   
385  $0.011$ ; Interaction:  $F_{(14,210)} = 0.6$ ,  $p = 0.86$ ; two-way ANOVA).

386 While this result suggests that Process S was unaffected by psilocin administration, changes may  
387 still be visible at the level of localised cortical activity. Power spectra were calculated by averaging  
388 over NREM sleep in the first recovery sleep episode (end of sleep deprivation to first wake  
389 episode at least 5 minutes duration, Vehicle:  $1.47 \pm 0.7$  hours, Psilocin:  $1.24 \pm 0.4$  hours). The  
390 expected elevations in slow wave activity relative to baseline were seen in frontal EEG, occipital  
391 EEG and mean LFP, but no significant differences were observed between psilocin and vehicle  
392 conditions (Figure 4F, 4G, 4H). Furthermore, the time course of average slow wave activity in  
393 NREM sleep over the remainder of the light period after sleep deprivation further shows no effect  
394 of psilocin, only of time, in both frontal EEG (Figure 4I; Drug:  $F_{(1,120)} = 0.09$ ,  $p = 0.76$ ; Time:  $F_{(14,120)}$   
395  $= 27.3$ ,  $p < 0.001$ ; Interaction:  $F_{(14,120)} = 0.05$ ,  $p = 1$ ; two-way ANOVA) and occipital EEG (Figure 4J;  
396 Drug:  $F_{(1,90)} = 0.97$ ,  $p = 0.33$ ; Time:  $F_{(14,90)} = 3.7$ ,  $p < 0.001$ ; Interaction:  $F_{(14,90)} = 0.04$ ,  $p = 1$ ; two-  
397 way ANOVA). However, a significant effect for psilocin was found in the time course of mean LFP  
398 slow wave activity (Drug:  $F_{(1,150)} = 23.0$ ,  $p < 0.001$ ; Time:  $F_{(14,150)} = 24.0$ ,  $p < 0.001$ ; Interaction:  
399  $F_{(14,150)} = 0.19$ ,  $p = 0.99$ ; two-way ANOVA), which exhibited a reduced rate of decrease in the  
400 psilocin condition (Figure 4K). To explore whether this result might be specific for the prefrontal  
401 cortex, it was repeated including only animals with confirmed electrode placements in prefrontal  
402 (prelimbic and infralimbic) cortex, finding the same significant effect of psilocin and a decreased

403 decay rate of SWA during recovery sleep after sleep deprivation (Drug:  $F_{(1,90)} = 16.7$ ,  $p < 0.001$ ;  
404 Time:  $F_{(14,90)} = 17.6$ ,  $p < 0.001$ ; Interaction:  $F_{(14,90)} = 0.14$ ,  $p = 0.99$ ; two-way ANOVA). This result  
405 implies that the Process S recovered more slowly after psilocin, but only on a local level in  
406 prefrontal and adjacent cortex, not at the global level as measured with EEG.

#### 407 **Electrophysiological characteristics of the psilocin-induced state**

408 The effects of psilocin on EEG and LFP spectra in different states of vigilance was then explored.  
409 Wake was analysed in both the undisturbed condition (from injection until the first NREM sleep  
410 attempt, Vehicle:  $18.6 \pm 17.2$  minutes, Psilocin:  $26.3 \pm 12.7$  minutes) and sleep deprivation  
411 condition (first 30 minutes after injection). Both NREM and REM sleep were analysed in the  
412 undisturbed condition from the first episode of NREM sleep after injection of at least 1-minute  
413 duration, to the next wake episode at least 5 minutes duration (NREM Vehicle:  $66.9 \pm 22.2$   
414 minutes; NREM Psilocin:  $52.2 \pm 20.8$  minutes; REM Vehicle:  $10.1 \pm 5.5$  minutes, REM Psilocin:  $7.3$   
415  $\pm 4.8$  minutes). In both wake conditions, baseline spectra from frontal EEG and LFP were  
416 characterised by a peak around 4 Hz (Figure 5A, 5B, 7A, 7B). Enhancement of power around 3-5  
417 Hz by psilocin was evidenced in the waking frontal EEG, and in the undisturbed condition in the  
418 LFP (Figure 5A, 5B, 7B). Notably this peak was reduced in the sleep deprivation condition in the  
419 LFP and with vehicle in frontal EEG (Figure 5B, 7B). Low frequency power increases in occipital  
420 EEG were broader and at a high frequency with psilocin (Figure 6A, 6B), reflecting widening of  
421 the theta (5-8 Hz) peak present in baseline spectra. These changes are likely linked to behaviour,  
422 for example the 3-5 Hz rhythm may be associated with quiet wakefulness (Contreras et al., 2021),  
423 and indeed a negative correlation was found between 3-5 Hz frontal EEG power and EMG variance  
424 per 4-second epoch as a measure of motor activity during the 3-hour period after psilocin  
425 injection (Spearman's  $R = -0.47 \pm 0.12$ ,  $n = 5$ ). High frequency power in the gamma range ( $> 30$   
426 Hz) was generally decreased by psilocin in both EEG derivations and to a greater degree in the  
427 undisturbed condition (Figure 5A, 5B, 6A, 6B). This effect was weaker in the LFP and

428 accompanied by an increase in high frequency power ( $> 60$  Hz) particularly during the sleep  
429 deprivation condition (Figure 7B).

430 In NREM sleep, no well-defined band-specific differences were identified between vehicle and  
431 psilocin conditions. A trend existed in all EEG and LFP signals for decreased low frequencies ( $< 4$   
432 Hz), perhaps reflecting that sleep was less intense (Figure 5C, 6C, 7C). During REM sleep after  
433 psilocin, high frequencies ( $> 30$  Hz) tended to be reduced, whereas low frequencies ( $< 8$  Hz and  
434 10-20 Hz) were mostly increased (Figure 5D, 6D, 7D). These differences might be interpreted as  
435 a bleeding of NREM-like activities (delta waves, spindles, reduced gamma) into REM sleep.

436

## Discussion

437 The aim of this work was to explore possible effects of psilocin, a classical psychedelic and agonist  
438 of the 5-HT<sub>2A</sub> receptor, on sleep-wake regulation and associated cortical activity in mice. Psilocin  
439 was administered to mice in both an undisturbed condition in which voluntary sleep occurs and  
440 a condition of enforced prolonged wakefulness. Compared to a vehicle control injection, psilocin  
441 was observed to acutely disrupt sleep, suppressing the maintenance of both NREM and REM  
442 sleep, resulting in a pattern of fragmented sleep attempts and frequent brief awakenings which  
443 lasted up to 3 hours. No enduring effects of psilocin were observed on sleep-wake quantities or  
444 episode duration. However, while the sleep homeostatic process (Process S) was not found to be  
445 disrupted by exposure to the drug in the “global” EEG signal, there was evidence for a slower  
446 decline of slow wave activity in the LFP in recovery sleep following sleep deprivation combined  
447 with psilocin injection compared to vehicle.

### 448 **Effects of serotonergic agents and antidepressants on sleep**

449 The role of the serotonin system in sleep-wake control is complex and somewhat controversial  
450 (Ursin 2008, Monti 2011). Serotonergic raphe neurones are more active during wakefulness than  
451 sleep and serotonin is widely included in the monoaminergic ascending arousal system thought  
452 to maintain wakefulness (Saper 2010). However, optogenetic studies in mice suggest that, while  
453 burst activity in the raphe is indeed wake promoting, tonic activity contributes to the build-up of  
454 sleep need (Oikonomou et al., 2019). An acute sleep-suppressing effect of psychedelic 5-HT<sub>2A</sub>  
455 receptor agonists has been previously reported in rodents and cats (Colasanti & Khazan, 1975;  
456 Kay & Martin, 1978; Monti & Jantos, 2006). Correspondingly, 5-HT<sub>2A</sub> receptor antagonists are  
457 sleep-promoting in rats (Monti & Jantos, 2006) and in mice, however 5-HT<sub>2A</sub> receptor knockout  
458 mice sleep less and exhibit an attenuated homeostatic sleep rebound (Popa et al, 2005). In  
459 humans, 5-HT<sub>2A</sub> receptor antagonists increase the depth and maintenance of sleep and have been  
460 explored in the treatment of insomnia (Vanover & Davis, 2010; Monti et al., 2018).

461 REM sleep suppression is a common effect of many different antidepressants with different  
462 pharmacological profiles, including selective serotonin reuptake inhibitors, serotonin-  
463 noradrenaline reuptake inhibitors, monoamine oxidase inhibitors and tricyclic antidepressants  
464 (McCarthy et al., 2016; Wichniak et al., 2017) and REM sleep is strongly associated with the  
465 regulation of emotional memory (Perogamvros & Schwarz, 2015). Disruption of REM sleep after  
466 psychedelic drug exposure has been previously reported in humans, albeit only in the single night  
467 after drug exposure (Barbanoj et al., 2008; Dudysová et al., 2020). Similarly, the observed  
468 suppression of REM sleep in this study lasted only on the order of hours, as REM sleep levels  
469 returned to match those of vehicle controls by the end of the light period and no evidence was  
470 found for effects manifesting in the following dark period or subsequent day. Given the limited  
471 duration of effects, it is concluded that psilocin does not necessarily induce long-term changes in  
472 sleep-wake architecture in mice, at least at the 2 mg/kg dose given here, and that it is unlikely  
473 that modulation of REM sleep quantity is a core mechanism of the psychological benefits of  
474 psychedelics. It remains possible, however, that REM sleep is affected in a more subtle way in  
475 terms of the underlying network activity.

#### 476 **Significance of the 3 - 5 Hz oscillation**

477 Analysis of frontal EEG and LFP spectra in these recordings identified a prominent 3 - 5 Hz peak  
478 amplified by psilocin. This peak was present in baseline wakefulness in both conditions, so likely  
479 corresponds an enhancement of a particular form of existing activity. Oscillatory activity in this  
480 frequency range has been previously associated with breathing during wakefulness in mice in the  
481 prefrontal cortex (Biskamp et al., 2017), as well as other areas (Jessberger et al., 2016; Chi et al.,  
482 2016) and serotonergic signalling is implicated in breathing regulation (Hilaire et al., 2010). The  
483 prefrontal respiratory rhythm emerges during wake immobility, synchronises with nasal  
484 breathing and modulates ongoing prefrontal cortical gamma activity and spike timing (Biskamp  
485 et al., 2017). This respiratory rhythm has also been linked with neocortical-hippocampal  
486 communication, plasticity, and memory (Liu et al., 2017). A recent study reported periods of EEG

487 oscillatory activity at around 4 Hz in mice after treatment with a 5-HT<sub>2A</sub> receptor agonist, finding  
488 that these coincide with behavioural inactivity, although breathing was not measured (Contreras  
489 et al., 2021). That this psilocin-associated oscillation is related to respiration remains to be  
490 directly tested, and moreover its functional significance within the context of both endogenous 5-  
491 HT<sub>2A</sub> receptor activation and the psychedelic phenomenon is unclear. Dissecting the behavioural  
492 and pharmacological influences on this oscillation would require more carefully controlled  
493 experiments.

#### 494 **Does psilocin affect Process S?**

495 One of the main aims of this study was to determine the effects of psilocin on Process S.  
496 Considering the ability of psilocybin to disrupt normal neuronal dynamics and to promote  
497 widespread functional plasticity, it can be predicted that psilocin injection would lead to a net  
498 increase in cortical synaptic strengths. According to the synaptic homeostasis hypothesis, this is  
499 identical to an increase in Process S (Tononi & Cirelli, 2003). However, it has been alternatively  
500 argued that the neuroplastic influence of psychedelics might actually complement or even  
501 substitute the effects of sleep, therefore reducing Process S, since both involve a temporary  
502 relaxation of functional constraints followed by self-organised re-optimisation (Froese et al.,  
503 2018).

504 Since the relationship between plasticity and sleep regulation is neither straightforward nor fully  
505 understood (Frank & Heller, 2019), the absence of a change in EEG slow wave activity found here  
506 should not be interpreted as evidence that neuroplasticity does not widely occur, or that  
507 psychedelics do not affect sleep regulation. A previous study in humans reported elevated EEG  
508 slow wave activity during sleep 11 hours after ingestion of ayahuasca, a traditional psychedelic  
509 drink containing dimethyltryptamine (Barbanoj et al., 2008). However, another human study  
510 with psilocybin reported that EEG slow wave activity was suppressed in the first cycle of NREM  
511 sleep (Dudysová et al., 2020). These differences may be simply due to species or drug dose, or  
512 even the possibility that the compound remained in the system at sleep onset, exerting acute

513 effects on arousal and the expression of the sleep slow wave itself, confounding inference into  
514 Process S per se. In this study a sleep deprivation duration was chosen which exceeded the  
515 duration of observable acute effects of the drug wake and NREM sleep. It is possible that the  
516 duration of sleep deprivation was too long, and as such a ceiling effect on slow wave activity  
517 reduced the ability to discriminate the effects on Process S between psilocin and vehicle  
518 conditions in the frontal EEG. Of course, reducing the sleep deprivation exacerbates the risk that  
519 the acute sleep-inhibiting effects of psilocin remain present, so this would be difficult to  
520 disentangle.

521 In this regard, the finding of a reduced recovery rate of Process S locally in the LFP targeting  
522 prefrontal cortex is of potential importance. The global Process S which manifests in slow wave  
523 activity at the EEG level has been suggested to result from the integration across the brain of many  
524 local Processes S, which in turn each reflect the recent history of local neuronal activities (Thomas  
525 et al., 2020). If the rate of Process S recovery is slowed locally in prefrontal regions, it is possible  
526 that recovery may occur more quickly elsewhere in the brain, such as more posterior cortex. The  
527 functional significance of this result is not certain and a more in-depth mapping of Process S  
528 across the cortical surface would be valuable, however, it does imply that the recovery of neuronal  
529 homeostasis after exposure to psychedelics is in some way slower in prefrontal regions. Increased  
530 slow wave activity indicates elevated neuronal synchronisation, so this result may well be linked  
531 to neuroplasticity of functional networks and is consistent with the widely formed hypothesis  
532 that the prefrontal cortex is a key cortical region affected by psilocybin.

### 533 **Future outlook**

534 Psychedelic drugs such as psilocin provide a novel approach to study the basic science  
535 underpinning sleep regulation, offering a means to manipulate the content of wakefulness and  
536 associated brain dynamics. Psychedelic stimulation offers important advantages compared to  
537 other manipulations of waking brain activity, such as optogenetic activation of cortical neurones,  
538 owing to its relative simplicity, physiological validity, pharmacological specificity, applicability to



539 humans, and comprehensibility in terms of the associated conscious experience. Similarly, sleep  
540 represents an overlooked aspect of physiology in the efforts to understand how psychedelic-  
541 mediated mechanisms yield psychological benefits.

542 It is likely that the effects of psychedelics on arousal and sleep regulation might depend on  
543 circadian time and preceding sleep-wake history. For example, it is known in humans that the 5-  
544 HT<sub>2A</sub> receptor density increases after sleep deprivation (Elmenhorst et al., 2012). These factors  
545 would be easy to control for and manipulate in future animal studies. Furthermore, the time scale  
546 over which psilocybin-associated plasticity (and putative associated effects on Process S) occurs  
547 is not known. While it is often assumed that plasticity must be induced during the acute  
548 experience, this is not necessarily guaranteed to be the case. If plasticity unfolds gradually over  
549 many days, or even selectively during sleep, this will not lead to changes visible in the EEG slow  
550 wave activity.

551 Perhaps the greatest challenge here will be to first better understand the extent to which the  
552 physiology of psychedelic action translates between animals and humans. This is particularly  
553 important, since therapeutic benefits in humans are dependent on appropriate psychological  
554 support, such as from a trained therapist. Identifying common mechanisms of action of  
555 psychedelics in both humans and rodents would be a great advance, and will require careful use  
556 of comparator drugs, with known pharmacological profiles and subjective effects, alongside  
557 translational tools such as EEG. Although many essential questions remain, a consistent picture  
558 of psychedelic biology is gradually forming, carrying great potential to inform neuroscience in  
559 areas spanning basic neurobiology to clinical practice.

560

## References

- 561 Achermann, Peter, Derk-Jan Dijk, Daniel P. Brunner, and Alexander A. Borbély. 1993. 'A Model of  
562 Human Sleep Homeostasis Based on EEG Slow-Wave Activity: Quantitative Comparison of  
563 Data and Simulations'. *Brain Research Bulletin* 31 (1): 97–113.  
564 [https://doi.org/10.1016/0361-9230\(93\)90016-5](https://doi.org/10.1016/0361-9230(93)90016-5).
- 565 Baglioni, Chiara, Gemma Battagliese, Bernd Feige, Kai Spiegelhalder, Christoph Nissen, Ulrich  
566 Voderholzer, Caterina Lombardo, and Dieter Riemann. 2011. 'Insomnia as a Predictor of  
567 Depression: A Meta-Analytic Evaluation of Longitudinal Epidemiological Studies'. *Journal of*  
568 *Affective Disorders* 135 (1–3): 10–19. <https://doi.org/10.1016/j.jad.2011.01.011>.
- 569 Barbanj, Manel J., Jordi Riba, S. Clos, S. Giménez, E. Grasa, and S. Romero. 2008. 'Daytime  
570 Ayahuasca Administration Modulates REM and Slow-Wave Sleep in Healthy Volunteers'.  
571 *Psychopharmacology* 196 (2): 315–26. <https://doi.org/10.1007/s00213-007-0963-0>.
- 572 Barre, Alexander, Coralie Berthoux, Dimitri De Bundel, Emmanuel Valjent, Joël Bockaert,  
573 Philippe Marin, and Carine Bécamel. 2016. 'Presynaptic Serotonin 2A Receptors Modulate  
574 Thalamocortical Plasticity and Associative Learning'. *Proceedings of the National Academy*  
575 *of Sciences of the United States of America* 113 (10): E1382-1391.  
576 <https://doi.org/10.1073/pnas.1525586113>.
- 577 Béïque, Jean-Claude, Mays Imad, Ljiljana Mladenovic, Jay A. Gingrich, and Rodrigo Andrade.  
578 2007. 'Mechanism of the 5-Hydroxytryptamine 2A Receptor-Mediated Facilitation of  
579 Synaptic Activity in Prefrontal Cortex'. *Proceedings of the National Academy of Sciences of*  
580 *the United States of America* 104 (23): 9870–75.  
581 <https://doi.org/10.1073/pnas.0700436104>.
- 582 Berthoux, Coralie, Alexander Barre, Joël Bockaert, Philippe Marin, and Carine Bécamel. 2019.  
583 'Sustained Activation of Postsynaptic 5-HT<sub>2A</sub> Receptors Gates Plasticity at Prefrontal  
584 Cortex Synapses'. *Cerebral Cortex* 29 (4): 1659–69.  
585 <https://doi.org/10.1093/cercor/bhy064>.
- 586 Biskamp, Jonatan, Marlene Bartos, and Jonas-Frederic Sauer. 2017. 'Organization of Prefrontal  
587 Network Activity by Respiration-Related Oscillations'. *Scientific Reports* 7: 45508.  
588 <https://doi.org/10.1038/srep45508>.
- 589 Borbély, A. A., and A. Wirz-Justice. 1982. 'Sleep, Sleep Deprivation and Depression. A Hypothesis  
590 Derived from a Model of Sleep Regulation'. *Human Neurobiology* 1 (3): 205–10.

- 591 Borbély, Alexander A., Serge Daan, Anna Wirz-Justice, and Tom Deboer. 2016. 'The Two-Process  
592 Model of Sleep Regulation: A Reappraisal'. *Journal of Sleep Research* 25 (2): 131–43.  
593 <https://doi.org/10.1111/jsr.12371>.
- 594 Cameron, Lindsay P., Charlie J. Benson, Lee E. Dunlap, and David E. Olson. 2018. 'Effects of N, N-  
595 Dimethyltryptamine on Rat Behaviors Relevant to Anxiety and Depression'. *ACS Chemical*  
596 *Neuroscience* 9 (7): 1582–90. <https://doi.org/10.1021/acchemneuro.8b00134>.
- 597 Carhart-Harris, Robin L. 2018. 'The Entropic Brain - Revisited'. *Neuropharmacology*,  
598 Psychedelics: New Doors, Altered Perceptions, 142 (November): 167–78.  
599 <https://doi.org/10.1016/j.neuropharm.2018.03.010>.
- 600 Carhart-Harris, Robin L, Mark Bolstridge, James Rucker, Camilla M J Day, David Erritzoe, Mendel  
601 Kaelen, Michael Bloomfield, et al. 2016. 'Psilocybin with Psychological Support for  
602 Treatment-Resistant Depression: An Open-Label Feasibility Study'. *The Lancet Psychiatry* 3  
603 (7): 619–27. [https://doi.org/10.1016/S2215-0366\(16\)30065-7](https://doi.org/10.1016/S2215-0366(16)30065-7).
- 604 Carhart-Harris, Robin L, and Guy M Goodwin. 2017. 'The Therapeutic Potential of Psychedelic  
605 Drugs: Past, Present, and Future'. *Neuropsychopharmacology* 42 (11): 2105–13.  
606 <https://doi.org/10.1038/npp.2017.84>.
- 607 Carhart-Harris, Robin L., Leor Roseman, Mark Bolstridge, Lysia Demetriou, J. Nienke Pannekoek,  
608 Matthew B. Wall, Mark Tanner, et al. 2017. 'Psilocybin for Treatment-Resistant Depression:  
609 fMRI-Measured Brain Mechanisms'. *Scientific Reports* 7 (1): 13187.  
610 <https://doi.org/10.1038/s41598-017-13282-7>.
- 611 Carhart-Harris, Robin Lester, Robert Leech, Peter John Hellyer, Murray Shanahan, Amanda  
612 Feilding, Enzo Tagliazucchi, Dante R. Chialvo, and David Nutt. 2014. 'The Entropic Brain: A  
613 Theory of Conscious States Informed by Neuroimaging Research with Psychedelic Drugs'.  
614 *Frontiers in Human Neuroscience* 8. <https://doi.org/10.3389/fnhum.2014.00020>.
- 615 Catlow, Briony J., Shijie Song, Daniel A. Paredes, Cheryl L. Kirstein, and Juan Sanchez-Ramos.  
616 2013. 'Effects of Psilocybin on Hippocampal Neurogenesis and Extinction of Trace Fear  
617 Conditioning'. *Experimental Brain Research* 228 (4): 481–91.  
618 <https://doi.org/10.1007/s00221-013-3579-0>.
- 619 Celada, Pau, M. Victoria Puig, and Francesc Artigas. 2013. 'Serotonin Modulation of Cortical  
620 Neurons and Networks'. *Frontiers in Integrative Neuroscience* 7.  
621 <https://doi.org/10.3389/fnint.2013.00025>.

- 622 Chi, Vivan Nguyen, Carola Müller, Thérèse Wolfenstetter, Yevgenij Yanovsky, Andreas Draguhn,  
623 Adriano B. L. Tort, and Jurij Brankač. 2016. 'Hippocampal Respiration-Driven Rhythm  
624 Distinct from Theta Oscillations in Awake Mice'. *Journal of Neuroscience* 36 (1): 162–77.  
625 <https://doi.org/10.1523/JNEUROSCI.2848-15.2016>.
- 626 Colasanti, B., and N. Khazan. 1975. 'Electroencephalographic Studies on the Development of  
627 Tolerance and Cross Tolerance to Mescaline in the Rat'. *Psychopharmacologia* 43 (3): 201–  
628 5. <https://doi.org/10.1007/bf00429251>.
- 629 Contreras, April, Matthew Khumnark, Rochelle M. Hines, and Dustin J. Hines. 2021. 'Behavioral  
630 Arrest and a Characteristic Slow Waveform Are Hallmark Responses to Selective 5-HT<sub>2A</sub>  
631 Receptor Activation'. *Scientific Reports* 11 (January). [https://doi.org/10.1038/s41598-  
632 021-81552-6](https://doi.org/10.1038/s41598-021-81552-6).
- 633 Daan, S., D. G. Beersma, and A. A. Borbély. 1984. 'Timing of Human Sleep: Recovery Process  
634 Gated by a Circadian Pacemaker'. *The American Journal of Physiology* 246 (2 Pt 2): R161-  
635 183. <https://doi.org/10.1152/ajpregu.1984.246.2.R161>.
- 636 Davis, Alan K., Frederick S. Barrett, Darrick G. May, Mary P. Cosimano, Nathan D. Sepeda,  
637 Matthew W. Johnson, Patrick H. Finan, and Roland R. Griffiths. 2020. 'Effects of Psilocybin-  
638 Assisted Therapy on Major Depressive Disorder'. *JAMA Psychiatry*, November.  
639 <https://doi.org/10.1001/jamapsychiatry.2020.3285>.
- 640 Dudysová, Daniela, Karolina Janků, Michal Šmotek, Elizaveta Saifutdinova, Jana Kopřivová, Jitka  
641 Bušková, Bryce Anthony Mander, et al. 2020. 'The Effects of Daytime Psilocybin  
642 Administration on Sleep: Implications for Antidepressant Action'. *Frontiers in  
643 Pharmacology* 11. <https://doi.org/10.3389/fphar.2020.602590>.
- 644 Elmenhorst, David, Tina Kroll, Andreas Matusch, and Andreas Bauer. 2012. 'Sleep Deprivation  
645 Increases Cerebral Serotonin 2A Receptor Binding in Humans'. *Sleep* 35 (12): 1615–23.  
646 <https://doi.org/10.5665/sleep.2230>.
- 647 Fisher, Simon P., Nanyi Cui, Laura E. McKillop, Jessica Gemignani, David M. Bannerman, Peter L.  
648 Oliver, Stuart N. Peirson, and Vladyslav V. Vyazovskiy. 2016. 'Stereotypic Wheel Running  
649 Decreases Cortical Activity in Mice'. *Nature Communications* 7 (October): ncomms13138.  
650 <https://doi.org/10.1038/ncomms13138>.
- 651 Frank, Marcos G., and H. Craig Heller. 2019. 'The Function(s) of Sleep'. *Handbook of Experimental  
652 Pharmacology*, April. [https://doi.org/10.1007/164\\_2018\\_140](https://doi.org/10.1007/164_2018_140).

- 653 Froese, Tom, Iwin Leenen, and Tomas Palenicek. 2018. 'A Role for Enhanced Functions of Sleep  
654 in Psychedelic Therapy?' *Adaptive Behavior* 26 (3): 129–35.  
655 <https://doi.org/10.1177/1059712318762735>.
- 656 Guillaumin, Mathilde C. C., Laura E. McKillop, Nanyi Cui, Simon P. Fisher, Russell G. Foster,  
657 Maarten de Vos, Stuart N. Peirson, Peter Achermann, and Vladyslav V. Vyazovskiy. 2018.  
658 'Cortical Region Specific Sleep Homeostasis in Mice: Effects of Time of Day and Waking  
659 Experience'. *Sleep*. <https://doi.org/10.1093/sleep/zsy079>.
- 660 Halberstadt, Adam L. 2015. 'Recent Advances in the Neuropsychopharmacology of Serotonergic  
661 Hallucinogens'. *Behavioural Brain Research* 277 (January): 99–120.  
662 <https://doi.org/10.1016/j.bbr.2014.07.016>.
- 663 Halberstadt, Adam L, Liselore Koedood, Susan B Powell, and Mark A Geyer. 2011. 'Differential  
664 Contributions of Serotonin Receptors to the Behavioral Effects of Indoleamine  
665 Hallucinogens in Mice'. *Journal of Psychopharmacology* 25 (11): 1548–61.  
666 <https://doi.org/10.1177/0269881110388326>.
- 667 Hibicke, Meghan, Alexis N. Landry, Hannah M. Kramer, Zoe K. Talman, and Charles D. Nichols.  
668 2020. 'Psychedelics, but Not Ketamine, Produce Persistent Antidepressant-like Effects in a  
669 Rodent Experimental System for the Study of Depression'. *ACS Chemical Neuroscience*,  
670 March. <https://doi.org/10.1021/acscchemneuro.9b00493>.
- 671 Hilaire, Gérard, Nicolas Voituron, Clément Menuet, Ronaldo M. Ichiyama, Hari H. Subramanian,  
672 and Mathias Dutschmann. 2010. 'THE ROLE OF SEROTONIN IN RESPIRATORY FUNCTION  
673 AND DYSFUNCTION'. *Respiratory Physiology & Neurobiology* 174 (1–2): 76–88.  
674 <https://doi.org/10.1016/j.resp.2010.08.017>.
- 675 Huber, R., T. Deboer, and I. Tobler. 2000. 'Effects of Sleep Deprivation on Sleep and Sleep EEG in  
676 Three Mouse Strains: Empirical Data and Simulations'. *Brain Research* 857 (1–2): 8–19.  
677 [https://doi.org/10.1016/s0006-8993\(99\)02248-9](https://doi.org/10.1016/s0006-8993(99)02248-9).
- 678 Huber, Reto, M. Felice Ghilardi, Marcello Massimini, and Giulio Tononi. 2004. 'Local Sleep and  
679 Learning'. *Nature* 430 (6995): 78–81. <https://doi.org/10.1038/nature02663>.
- 680 Jessberger, Jakob, Weiwei Zhong, Jurij Brankač, and Andreas Draguhn. 2016. 'Olfactory Bulb  
681 Field Potentials and Respiration in Sleep-Wake States of Mice'. *Neural Plasticity*.  
682 <https://www.hindawi.com/journals/np/2016/4570831/>.

- 683 Kay, D. C., and W. R. Martin. 1978. 'LSD and Tryptamine Effects on Sleep/Wakefulness and  
684 Electrocardiogram Patterns in Intact Cats'. *Psychopharmacology* 58 (3): 223–28.  
685 <https://doi.org/10.1007/bf00427383>.
- 686 Kometer, Michael, André Schmidt, Lutz Jäncke, and Franz X. Vollenweider. 2013. 'Activation of  
687 Serotonin 2A Receptors Underlies the Psilocybin-Induced Effects on Alpha Oscillations,  
688 N170 Visual-Evoked Potentials, and Visual Hallucinations'. *Journal of Neuroscience* 33 (25):  
689 10544–51. <https://doi.org/10.1523/JNEUROSCI.3007-12.2013>.
- 690 Levenstein, Daniel, Brendon O Watson, John Rinzel, and György Buzsáki. 2017. 'Sleep Regulation  
691 of the Distribution of Cortical Firing Rates'. *Current Opinion in Neurobiology, Neurobiology*  
692 *of Sleep*, 44 (June): 34–42. <https://doi.org/10.1016/j.conb.2017.02.013>.
- 693 Liu, Yu, Samuel S. McAfee, and Detlef H. Heck. 2017. 'Hippocampal Sharp-Wave Ripples in  
694 Awake Mice Are Entrained by Respiration'. *Scientific Reports* 7 (1): 1–9.  
695 <https://doi.org/10.1038/s41598-017-09511-8>.
- 696 Ly, Calvin, Alexandra C. Greb, Lindsay P. Cameron, Jonathan M. Wong, Eden V. Barragan, Paige C.  
697 Wilson, Kyle F. Burbach, et al. 2018. 'Psychedelics Promote Structural and Functional  
698 Neural Plasticity'. *Cell Reports* 23 (11): 3170–82.  
699 <https://doi.org/10.1016/j.celrep.2018.05.022>.
- 700 Madsen, Martin K., Patrick M. Fisher, Daniel Burmester, Agnete Dyssegaard, Dea S. Stenbæk,  
701 Sara Kristiansen, Sys S. Johansen, et al. 2019. 'Psychedelic Effects of Psilocybin Correlate  
702 with Serotonin 2A Receptor Occupancy and Plasma Psilocin Levels'.  
703 *Neuropsychopharmacology* 44 (7): 1328–34. <https://doi.org/10.1038/s41386-019-0324-9>.
- 704 Marek, Gerard J. 2018. 'Interactions of Hallucinogens with the Glutamatergic System: Permissive  
705 Network Effects Mediated Through Cortical Layer V Pyramidal Neurons'. Edited by Adam  
706 L. Halberstadt, Franz X. Vollenweider, and David E. Nichols. *Behavioral Neurobiology of*  
707 *Psychedelic Drugs, Current Topics in Behavioral Neurosciences*, , 107–35.  
708 [https://doi.org/10.1007/7854\\_2017\\_480](https://doi.org/10.1007/7854_2017_480).
- 709 Mason, N. L., K. P. C. Kuypers, F. Müller, J. Reckweg, D. H. Y. Tse, S. W. Toennes, N. R. P. W. Hutten,  
710 et al. 2020. 'Me, Myself, Bye: Regional Alterations in Glutamate and the Experience of Ego  
711 Dissolution with Psilocybin'. *Neuropsychopharmacology* 45 (12): 2003–11.  
712 <https://doi.org/10.1038/s41386-020-0718-8>.
- 713 McCarthy, Andrew, Keith Wafford, Elaine Shanks, Marcin Ligocki, Dale M. Edgar, and Derk-Jan  
714 Dijk. 2016. 'REM Sleep Homeostasis in the Absence of REM Sleep: Effects of

- 715 Antidepressants'. *Neuropharmacology* 108 (September): 415–25.  
716 <https://doi.org/10.1016/j.neuropharm.2016.04.047>.
- 717 Meerlo, Peter, Robbert Havekes, and Axel Steiger. 2015. 'Chronically Restricted or Disrupted  
718 Sleep as a Causal Factor in the Development of Depression'. *Current Topics in Behavioral  
719 Neurosciences* 25: 459–81. [https://doi.org/10.1007/7854\\_2015\\_367](https://doi.org/10.1007/7854_2015_367).
- 720 Milinski, Linus, Simon P. Fisher, Nanyi Cui, Laura E. McKillop, Cristina Blanco Duque, Gauri Ang,  
721 Tomoko Yamagata, David M. Bannerman, and Vladyslav V. Vyazovskiy. 2020. 'Waking  
722 Experience Modulates Sleep Need in Mice'. *BioRxiv*, July, 2020.07.25.219642.  
723 <https://doi.org/10.1101/2020.07.25.219642>.
- 724 Monti, Jaime M. 2011. 'Serotonin Control of Sleep-Wake Behavior'. *Sleep Medicine Reviews* 15  
725 (4): 269–81. <https://doi.org/10.1016/j.smrv.2010.11.003>.
- 726 Monti, Jaime M., and Héctor Jantos. 2006. 'Effects of the Serotonin 5-HT<sub>2A/2C</sub> Receptor Agonist  
727 DOI and of the Selective 5-HT<sub>2A</sub> or 5-HT<sub>2C</sub> Receptor Antagonists EMD 281014 and SB-  
728 243213, Respectively, on Sleep and Waking in the Rat'. *European Journal of Pharmacology*  
729 553 (1–3): 163–70. <https://doi.org/10.1016/j.ejphar.2006.09.027>.
- 730 Monti, Jaime M., Seithikurippu R. Pandi Perumal, D. Warren Spence, and Pablo Torterolo. 2018.  
731 'The Involvement of 5-HT<sub>2A</sub> Receptor in the Regulation of Sleep and Wakefulness, and the  
732 Potential Therapeutic Use of Selective 5-HT<sub>2A</sub> Receptor Antagonists and Inverse Agonists  
733 for the Treatment of an Insomnia Disorder'. In *5-HT<sub>2A</sub> Receptors in the Central Nervous  
734 System*, edited by Bruno P. Guiard and Giuseppe Di Giovanni, 311–37. The Receptors.  
735 Cham: Springer International Publishing. [https://doi.org/10.1007/978-3-319-70474-6\\_13](https://doi.org/10.1007/978-3-319-70474-6_13).
- 736 Müller, F., C. Lenz, P. Dolder, U. Lang, A. Schmidt, M. Liechti, and S. Borgwardt. 2017. 'Increased  
737 Thalamic Resting-State Connectivity as a Core Driver of LSD-Induced Hallucinations'. *Acta  
738 Psychiatrica Scandinavica* 136 (6): 648–57. <https://doi.org/10.1111/acps.12818>.
- 739 Müller, Felix, Friederike Holze, Patrick Dolder, Laura Ley, Patrick Vizeli, Alain Soltermann,  
740 Matthias E. Liechti, and Stefan Borgwardt. 2020. 'MDMA-Induced Changes in within-  
741 Network Connectivity Contradict the Specificity of These Alterations for the Effects of  
742 Serotonergic Hallucinogens'. *Neuropsychopharmacology* 46 (3): 545–53.  
743 <https://doi.org/10.1038/s41386-020-00906-2>.
- 744 Muthukumaraswamy, Suresh D., Robin L. Carhart-Harris, Rosalyn J. Moran, Matthew J. Brookes,  
745 Tim M. Williams, David Errtizoe, Ben Sessa, et al. 2013. 'Broadband Cortical  
746 Desynchronization Underlies the Human Psychedelic State'. *Journal of Neuroscience* 33  
747 (38): 15171–83. <https://doi.org/10.1523/JNEUROSCI.2063-13.2013>.

- 748 Oikonomou, Grigorios, Michael Altermatt, Rong wei Zhang, Gerard M. Coughlin, Christin Montz,  
749 Viviana Gradinaru, and David A. Prober. 2019. 'The Serotonergic Raphe Promote Sleep in  
750 Zebrafish and Mice'. *Neuron* 103 (4): 686-701.e8.  
751 <https://doi.org/10.1016/j.neuron.2019.05.038>.
- 752 Pacheco, Alejandro Torrado, Juliet Bottorff, Ya Gao, and Gina G. Turrigiano. 2020. 'Sleep  
753 Promotes Downward Firing Rate Homeostasis'. *Neuron* 0 (0).  
754 <https://doi.org/10.1016/j.neuron.2020.11.001>.
- 755 Paxinos, George, and Keith Franklin. 2013. *The Rat Brain in Stereotaxic Coordinates - 7th Edition*.  
756 [https://www.elsevier.com/books/the-rat-brain-in-stereotaxic-coordinates/paxinos/978-](https://www.elsevier.com/books/the-rat-brain-in-stereotaxic-coordinates/paxinos/978-0-12-391949-6)  
757 [0-12-391949-6](https://www.elsevier.com/books/the-rat-brain-in-stereotaxic-coordinates/paxinos/978-0-12-391949-6).
- 758 Perogamvros, Lampros, and Sophie Schwartz. 2015. 'Sleep and Emotional Functions'. *Current*  
759 *Topics in Behavioral Neurosciences* 25: 411–31. [https://doi.org/10.1007/7854\\_2013\\_271](https://doi.org/10.1007/7854_2013_271).
- 760 Popa, Daniela, Clément Léna, Véronique Fabre, Caroline Prenat, Jay Gingrich, Pierre Escourrou,  
761 Michel Hamon, and Joëlle Adrien. 2005. 'Contribution of 5-HT<sub>2</sub> Receptor Subtypes to  
762 Sleep–Wakefulness and Respiratory Control, and Functional Adaptations in Knock-Out  
763 Mice Lacking 5-HT<sub>2A</sub> Receptors'. *Journal of Neuroscience* 25 (49): 11231–38.  
764 <https://doi.org/10.1523/JNEUROSCI.1724-05.2005>.
- 765 Preller, Katrin H, Joshua B Burt, Jie Lisa Ji, Charles H Schleifer, Brendan D Adkinson, Philipp  
766 Stämpfli, Erich Seifritz, et al. 2018. 'Changes in Global and Thalamic Brain Connectivity in  
767 LSD-Induced Altered States of Consciousness Are Attributable to the 5-HT<sub>2A</sub> Receptor'.  
768 Edited by Laurence Tudor Hunt and Timothy E Behrens. *ELife* 7 (October): e35082.  
769 <https://doi.org/10.7554/eLife.35082>.
- 770 Preller, Katrin H., Patricia Duerler, Joshua B. Burt, Jie Lisa Ji, Brendan Adkinson, Philipp Stämpfli,  
771 Erich Seifritz, et al. 2020. 'Psilocybin Induces Time-Dependent Changes in Global  
772 Functional Connectivity'. *Biological Psychiatry* 88 (2): 197–207.  
773 <https://doi.org/10.1016/j.biopsych.2019.12.027>.
- 774 Rambousek, Lukas, Tomas Palenicek, Karel Vales, and Ales Stuchlik. 2014. 'The Effect of Psilocin  
775 on Memory Acquisition, Retrieval, and Consolidation in the Rat'. *Frontiers in Behavioral*  
776 *Neuroscience* 8. <https://doi.org/10.3389/fnbeh.2014.00180>.
- 777 Rasch, Bjorn, and Jan Born. 2013. 'About Sleep's Role in Memory'. *Physiological Reviews* 93 (2):  
778 681–766. <https://doi.org/10.1152/physrev.00032.2012>.



- 779 Rattenborg, Niels C., Steven L. Lima, and John A. Lesku. 2012. 'Sleep Locally, Act Globally'. *The*  
780 *Neuroscientist* 18 (5): 533–46. <https://doi.org/10.1177/1073858412441086>.
- 781 Reichert, Sabine, Oriol Pavón Arocas, and Jason Rihel. 2019. 'The Neuropeptide Galanin Is  
782 Required for Homeostatic Rebound Sleep Following Increased Neuronal Activity'. *Neuron*  
783 104 (2): 370-384.e5. <https://doi.org/10.1016/j.neuron.2019.08.010>.
- 784 Riga, Maurizio S., Laia Lladó-Pelfort, Francesc Artigas, and Pau Celada. 2018. 'The Serotonin  
785 Hallucinogen 5-MeO-DMT Alters Cortico-Thalamic Activity in Freely Moving Mice:  
786 Regionally-Selective Involvement of 5-HT1A and 5-HT2A Receptors'. *Neuropharmacology,*  
787 *Psychedelics: New Doors, Altered Perceptions*, 142 (November): 219–30.  
788 <https://doi.org/10.1016/j.neuropharm.2017.11.049>.
- 789 Roseman, Leor, Robert Leech, Amanda Feilding, David J. Nutt, and Robin L. Carhart-Harris. 2014.  
790 'The Effects of Psilocybin and MDMA on Between-Network Resting State Functional  
791 Connectivity in Healthy Volunteers'. *Frontiers in Human Neuroscience* 8.  
792 <https://doi.org/10.3389/fnhum.2014.00204>.
- 793 Santana, Noemí, Analía Bortolozzi, Jordi Serrats, Guadalupe Mengod, and Francesc Artigas.  
794 2004. 'Expression of Serotonin1A and Serotonin2A Receptors in Pyramidal and GABAergic  
795 Neurons of the Rat Prefrontal Cortex'. *Cerebral Cortex* 14 (10): 1100–1109.  
796 <https://doi.org/10.1093/cercor/bhh070>.
- 797 Saper, Clifford B., Patrick M. Fuller, Nigel P. Pedersen, Jun Lu, and Thomas E. Scammell. 2010.  
798 'Sleep State Switching'. *Neuron* 68 (6): 1023–42.  
799 <https://doi.org/10.1016/j.neuron.2010.11.032>.
- 800 Saulin, Anne, Markus Savli, and Rupert Lanzenberger. 2012. 'Serotonin and Molecular  
801 Neuroimaging in Humans Using PET'. *Amino Acids* 42 (6): 2039–57.  
802 <https://doi.org/10.1007/s00726-011-1078-9>.
- 803 Steiger, Axel, and Mayumi Kimura. 2010. 'Wake and Sleep EEG Provide Biomarkers in  
804 Depression'. *Journal of Psychiatric Research* 44 (4): 242–52.  
805 <https://doi.org/10.1016/j.jpsychires.2009.08.013>.
- 806 Thomas, Christopher W, Mathilde CC Guillaumin, Laura E McKillop, Peter Achermann, and  
807 Vladyslav V Vyazovskiy. 2020. 'Global Sleep Homeostasis Reflects Temporally and Spatially  
808 Integrated Local Cortical Neuronal Activity'. *eLife* 9. <https://doi.org/10.7554/eLife.54148>.
- 809 Tononi, Giulio, and Chiara Cirelli. 2003. 'Sleep and Synaptic Homeostasis: A Hypothesis'. *Brain*  
810 *Research Bulletin* 62 (2): 143–50. <https://doi.org/10.1016/j.brainresbull.2003.09.004>.

- 811 Tononi, Giulio, and Chiara Cirelli. 2014. 'Sleep and the Price of Plasticity: From Synaptic and  
812 Cellular Homeostasis to Memory Consolidation and Integration'. *Neuron* 81 (1): 12–34.  
813 <https://doi.org/10.1016/j.neuron.2013.12.025>.
- 814 Ursin, Reidun. 2008. 'Changing Concepts on the Role of Serotonin in the Regulation of Sleep and  
815 Waking'. In *Serotonin and Sleep: Molecular, Functional and Clinical Aspects*, edited by Jaime  
816 M. Monti, S. R. Pandi-Perumal, Barry L. Jacobs, and David J. Nutt, 3–21. Basel: Birkhäuser.  
817 [https://doi.org/10.1007/978-3-7643-8561-3\\_1](https://doi.org/10.1007/978-3-7643-8561-3_1).
- 818 Vanover, Kimberly E, and Robert E Davis. 2010. 'Role of 5-HT2A Receptor Antagonists in the  
819 Treatment of Insomnia'. *Nature and Science of Sleep* 2 (July): 139–50.
- 820 Vollenweider, F. X., M. F. Vollenweider-Scherpenhuyzen, A. Bäbler, H. Vogel, and D. Hell. 1998.  
821 'Psilocybin Induces Schizophrenia-like Psychosis in Humans via a Serotonin-2 Agonist  
822 Action'. *Neuroreport* 9 (17): 3897–3902. [https://doi.org/10.1097/00001756-199812010-](https://doi.org/10.1097/00001756-199812010-00024)  
823 [00024](https://doi.org/10.1097/00001756-199812010-00024).
- 824 Vollenweider, Franz X., and Michael Kometer. 2010. 'The Neurobiology of Psychedelic Drugs:  
825 Implications for the Treatment of Mood Disorders'. *Nature Reviews Neuroscience* 11 (9):  
826 642–51. <https://doi.org/10.1038/nrn2884>.
- 827 Vollenweider, Franz X., and Katrin H. Preller. 2020. 'Psychedelic Drugs: Neurobiology and  
828 Potential for Treatment of Psychiatric Disorders'. *Nature Reviews Neuroscience* 21 (11):  
829 611–24. <https://doi.org/10.1038/s41583-020-0367-2>.
- 830 Vyazovskiy, Vladyslav V., and Kenneth D. Harris. 2013. 'Sleep and the Single Neuron: The Role of  
831 Global Slow Oscillations in Individual Cell Rest'. *Nature Reviews Neuroscience* 14 (6): 443–  
832 51. <https://doi.org/10.1038/nrn3494>.
- 833 Watson, Brendon O., Daniel Levenstein, J. Palmer Greene, Jennifer N. Gelinas, and György  
834 Buzsáki. 2016. 'Network Homeostasis and State Dynamics of Neocortical Sleep'. *Neuron* 90  
835 (4): 839–52. <https://doi.org/10.1016/j.neuron.2016.03.036>.
- 836 Wichniak, Adam, Aleksandra Wierzbicka, Małgorzata Wałęcka, and Wojciech Jernajczyk. 2017.  
837 'Effects of Antidepressants on Sleep'. *Current Psychiatry Reports* 19 (9).  
838 <https://doi.org/10.1007/s11920-017-0816-4>.
- 839 Wirz-Justice, A., and R. H. Van den Hoofdakker. 1999. 'Sleep Deprivation in Depression: What Do  
840 We Know, Where Do We Go?' *Biological Psychiatry* 46 (4): 445–53.  
841 [https://doi.org/10.1016/s0006-3223\(99\)00125-0](https://doi.org/10.1016/s0006-3223(99)00125-0).

- 842 Wirz-Justice, Anna, Francesco Benedetti, Mathias Berger, Raymond W. Lam, Klaus Martiny,  
843 Michael Terman, and Joseph C. Wu. 2005. 'Chronotherapeutics (Light and Wake Therapy)  
844 in Affective Disorders'. *Psychological Medicine* 35 (7): 939–44.  
845 <https://doi.org/10.1017/s003329170500437x>.
- 846 Wood, Jesse, Yunbok Kim, and Bitá Moghaddam. 2012. 'Disruption of Prefrontal Cortex Large  
847 Scale Neuronal Activity by Different Classes of Psychotomimetic Drugs'. *The Journal of*  
848 *Neuroscience* 32 (9): 3022–31. <https://doi.org/10.1523/JNEUROSCI.6377-11.2012>.
- 849 Wulff, Katharina, Silvia Gatti, Joseph G. Wettstein, and Russell G. Foster. 2010. 'Sleep and  
850 Circadian Rhythm Disruption in Psychiatric and Neurodegenerative Disease'. *Nature*  
851 *Reviews. Neuroscience* 11 (8): 589–99. <https://doi.org/10.1038/nrn2868>.
- 852 Zhang, Gongliang, Herborg N. Asgeirsdottir, Sarah J. Cohen, Alcira H. Munchow, Mercy P.  
853 Barrera, and Robert W. Stackman. 2013. 'Stimulation of Serotonin 2A Receptors Facilitates  
854 Consolidation and Extinction of Fear Memory in C57BL/6J Mice'. *Neuropharmacology* 64  
855 (1): 403–13. <https://doi.org/10.1016/j.neuropharm.2012.06.007>.

## Figures

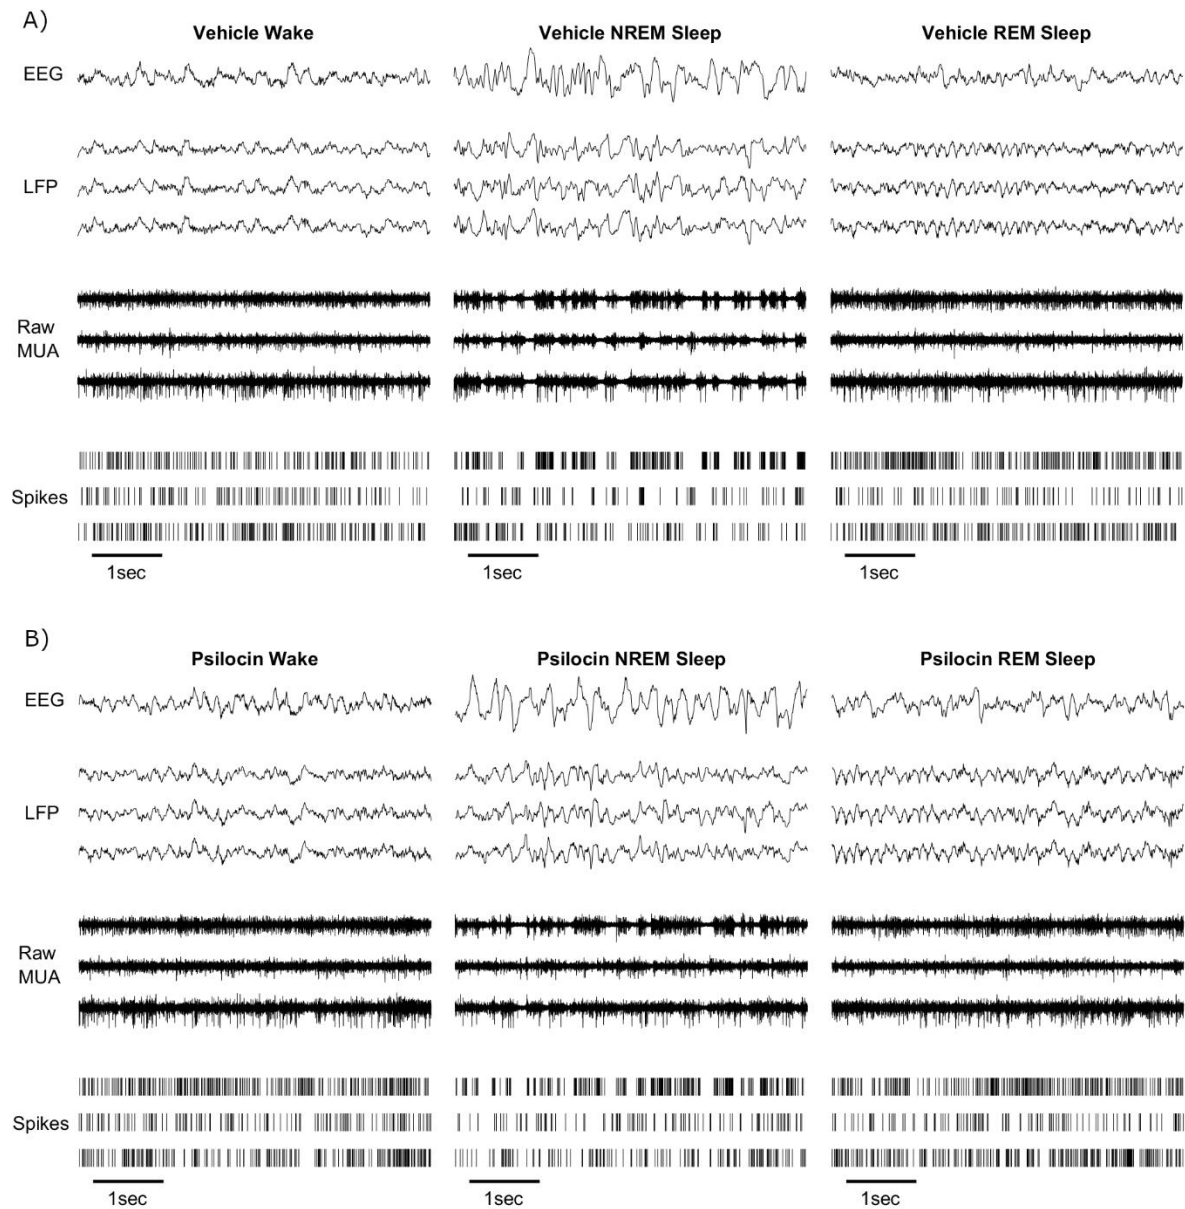

**Figure 1.** An example segment of 5 seconds duration of frontal electroencephalogram (EEG), 3 cortical local field potentials (LFP), corresponding raw signal with multi-unit activity (MUA) and detected spikes in representative segments of waking, NREM and REM sleep, soon after **A)** injection with vehicle solution, **B)** injection with psilocin.

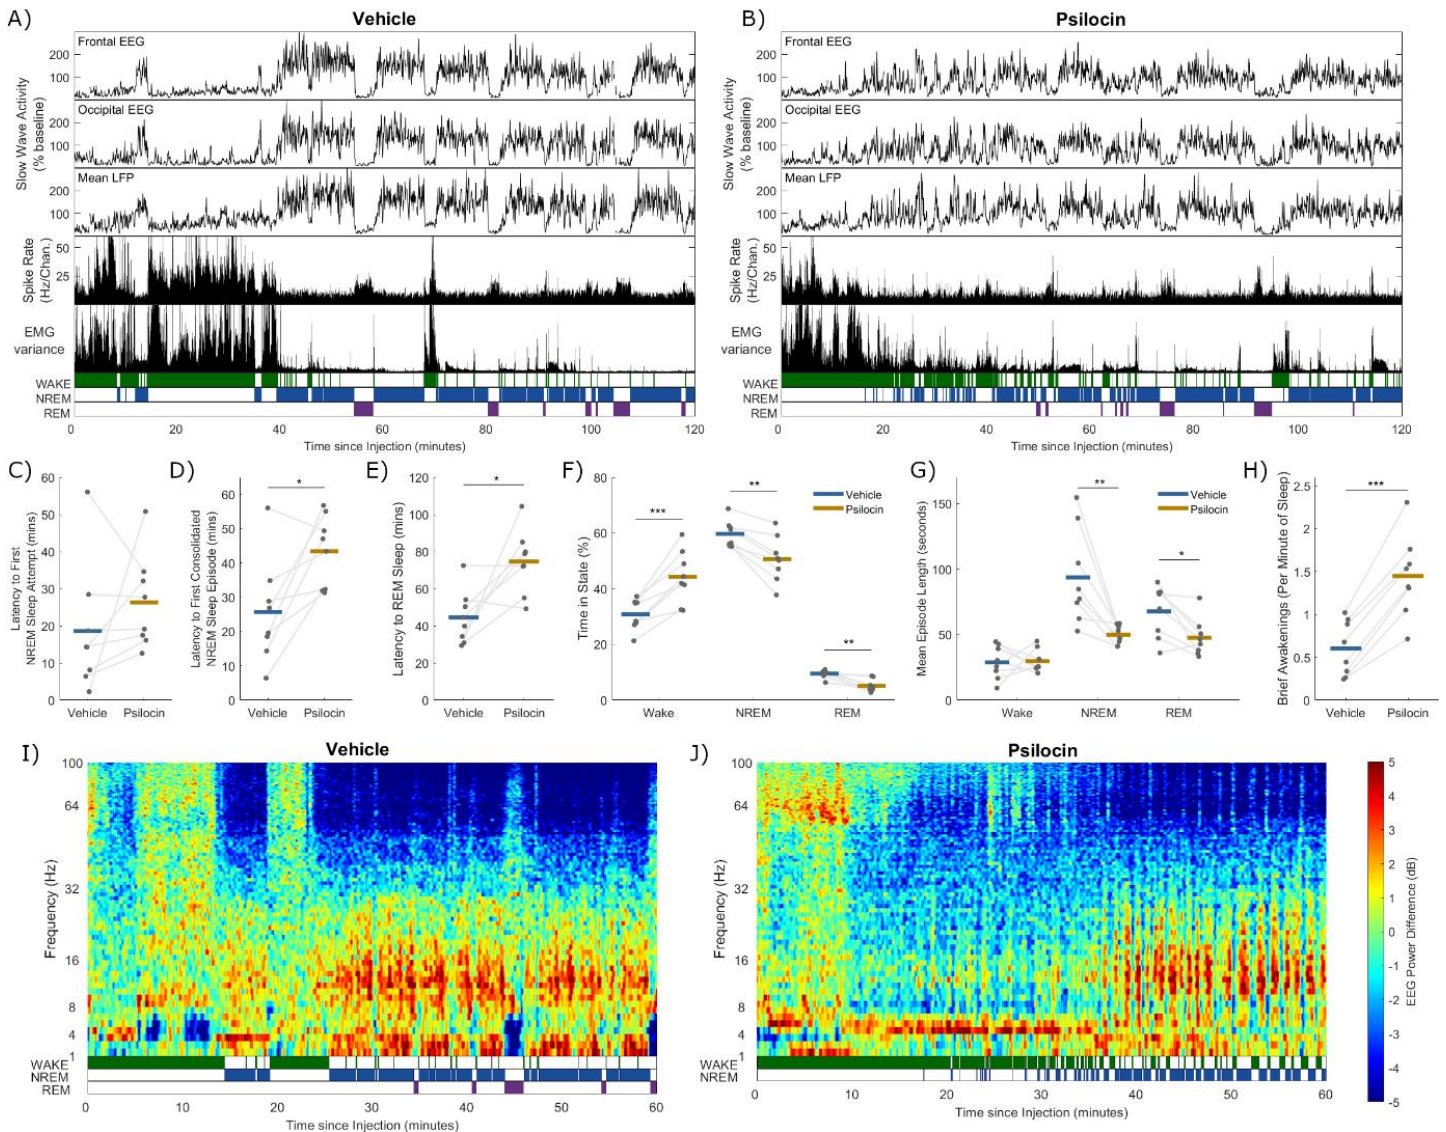

**Figure 2.** A representative example of slow wave activity (0.5 - 4 Hz power) derived from frontal electroencephalogram (EEG), occipital EEG, and mean local field potential (LFP), alongside the total recorded spike firing rate (spikes per second per channel), variance of the electromyogram (EMG) and scored vigilance states, all with a resolution of 4 seconds over a period of 2 hours after **A)** injection with vehicle, and **B)** injection with psilocin, in the undisturbed condition. The latency in minutes from injection **C)** until the first 4-second epoch scored as NREM sleep, **D)** until the first continuous NREM sleep episode at least 1-minute duration, and **E)** until the first 4-second epoch scored as REM sleep. **F)** The percentage of the three-hour period after injection which was scored as wake, NREM or REM sleep, and **G)** the mean length in seconds of wake, NREM and REM sleep episodes in this time. **H)** The number of

brief awakenings (wake episodes < 20 seconds occurring within NREM episodes at least 1-minute duration) per minute of NREM sleep during the first hour after injection. In **C-H** grey dots correspond to individual animals, with grey lines linking values from the same animal, coloured lines indicate the group mean for vehicle (blue) and psilocin (yellow) conditions and asterisks denote statistical significance with a paired t-test; \*:  $p < 0.05$ , \*\*:  $p < 0.01$ , \*\*\*:  $p < 0.001$ . Time-frequency plots characterising changes in frontal EEG spectral power (in decibels relative to power averaged over the baseline day) over the first hour after injection with **I** vehicle and **J** psilocin, from one representative example (different animal to **A** & **B**).

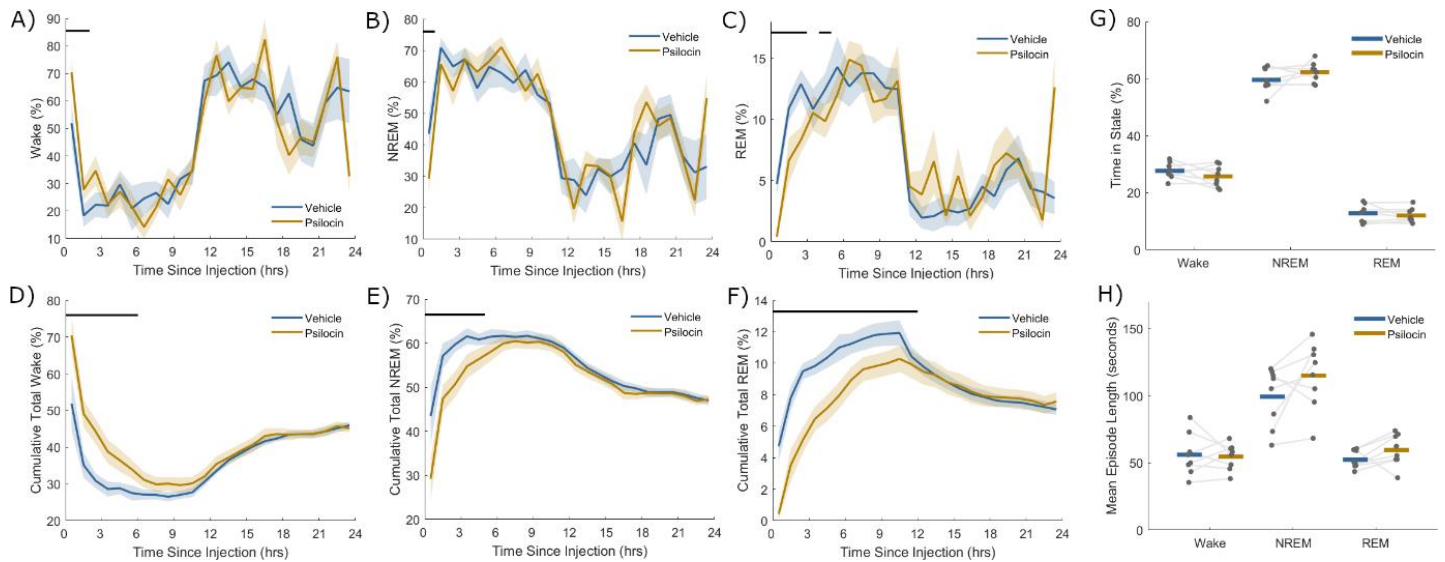

**Figure 3.** Percentage of time scored as **A)** wake, **B)** NREM sleep and **C)** REM sleep in successive non-overlapping windows of one hour up to 24 hours after injection with vehicle (blue) and psilocin (yellow). The total cumulative percentage of time scored as **D)** wake, **E)** NREM sleep and **F)** REM sleep from injection until up to 24 hours after injection with vehicle (blue) and with psilocin (yellow), as a function of time since injection. Coloured lines denote the mean and sections the standard error of the mean over all animals. Black lines indicate time points that were significantly different ( $p < 0.05$ ) according to paired t-tests applied at discrete time points. **G)** The percentage time from three-hours period after injection until the end of the light period which was scored as wake, NREM or REM sleep, and **H)** the mean length in seconds of wake, NREM and REM sleep episodes in this time. Grey dots correspond to individual animals, with grey lines linking values from the same animal, coloured lines indicate the group mean for vehicle (blue) and psilocin (yellow) conditions.

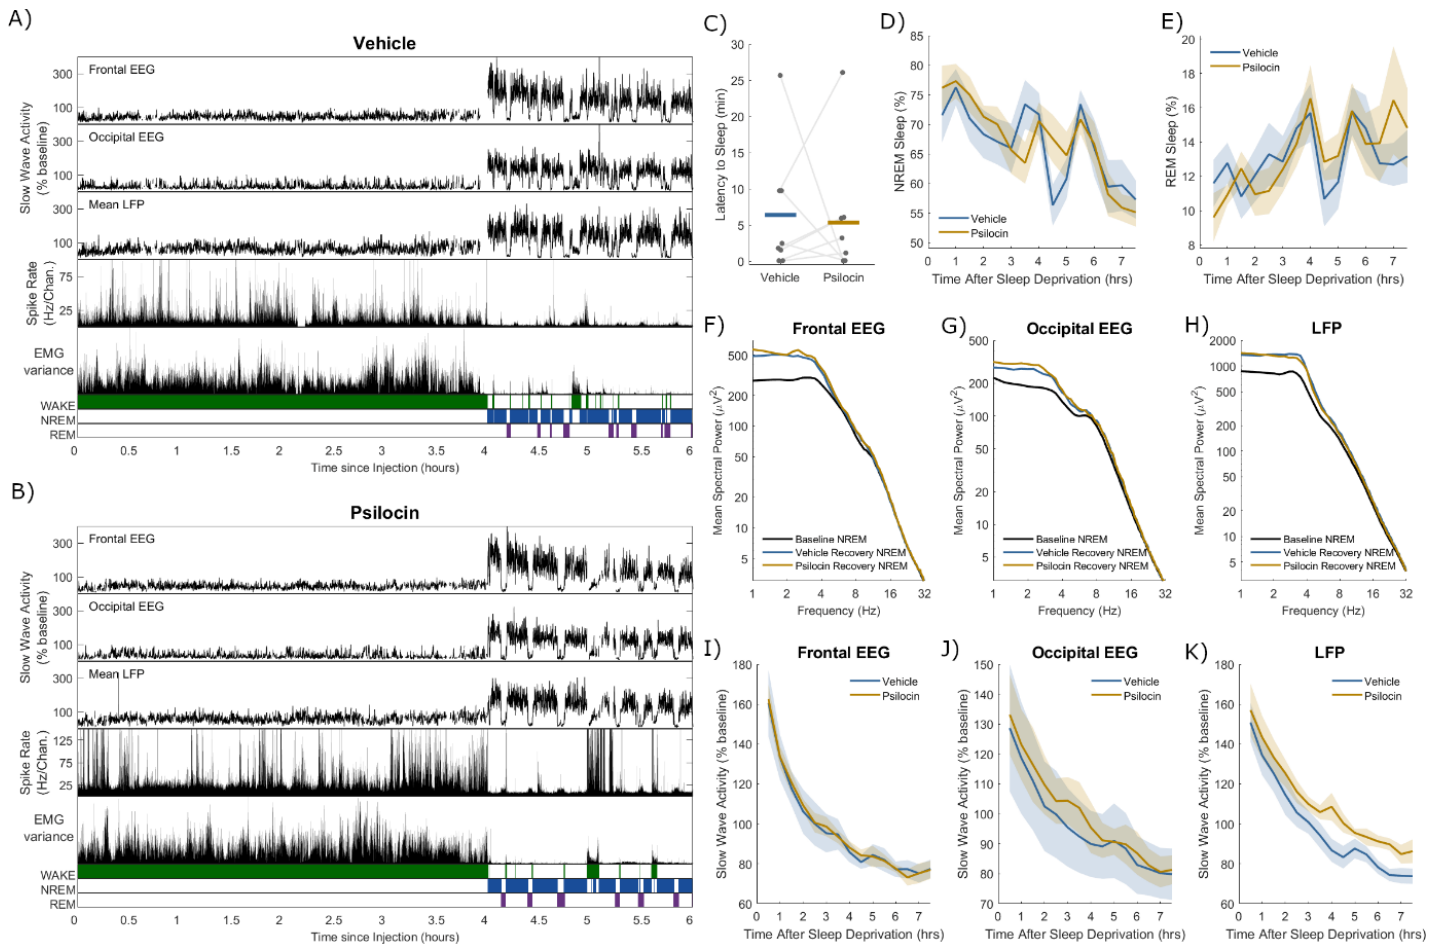

**Figure 4.** A representative example of slow wave activity (0.5 - 4 Hz power) derived from frontal electroencephalogram (EEG), occipital EEG, and mean local field potential (LFP), alongside the total recorded spike firing rate (spikes per second per channel), variance of the electromyogram (EMG) and scored vigilance states, all with a resolution of 4 seconds over a period of 6 hours comprising 4 hours of sleep deprivation and 2 hours of recovery sleep, including **A)** injection with vehicle, and **B)** injection with psilocin. **C)** Latency from the end of sleep deprivation to the first episode of NREM sleep at least 1-minute duration. Grey dots correspond to individual animals, with grey lines linking values from the same animal, coloured lines indicate the group mean for vehicle (blue) and psilocin (yellow) conditions. The percentage of time scored as **D)** NREM sleep and **E)** REM sleep from the end of sleep deprivation until the end of the light period. Coloured lines denote the mean and sections the standard error of the mean over all animals. The mean power spectra of **F)** frontal EEG, **G)** occipital EEG and **H)** mean LFP in NREM sleep in the first period of sleep after the end of sleep deprivation, compared



with mean spectra over all NREM sleep the baseline day. The time series of slow wave activity (0.5 – 4 Hz power, relative to that on the baseline day) derived from **I**) frontal EEG, **J**) occipital EEG and **K**) mean LFP, from the end of sleep deprivation until the end of the light period. Individual time points correspond to averages of slow wave activity in overlapping 1-hour windows centred every 30 minutes.

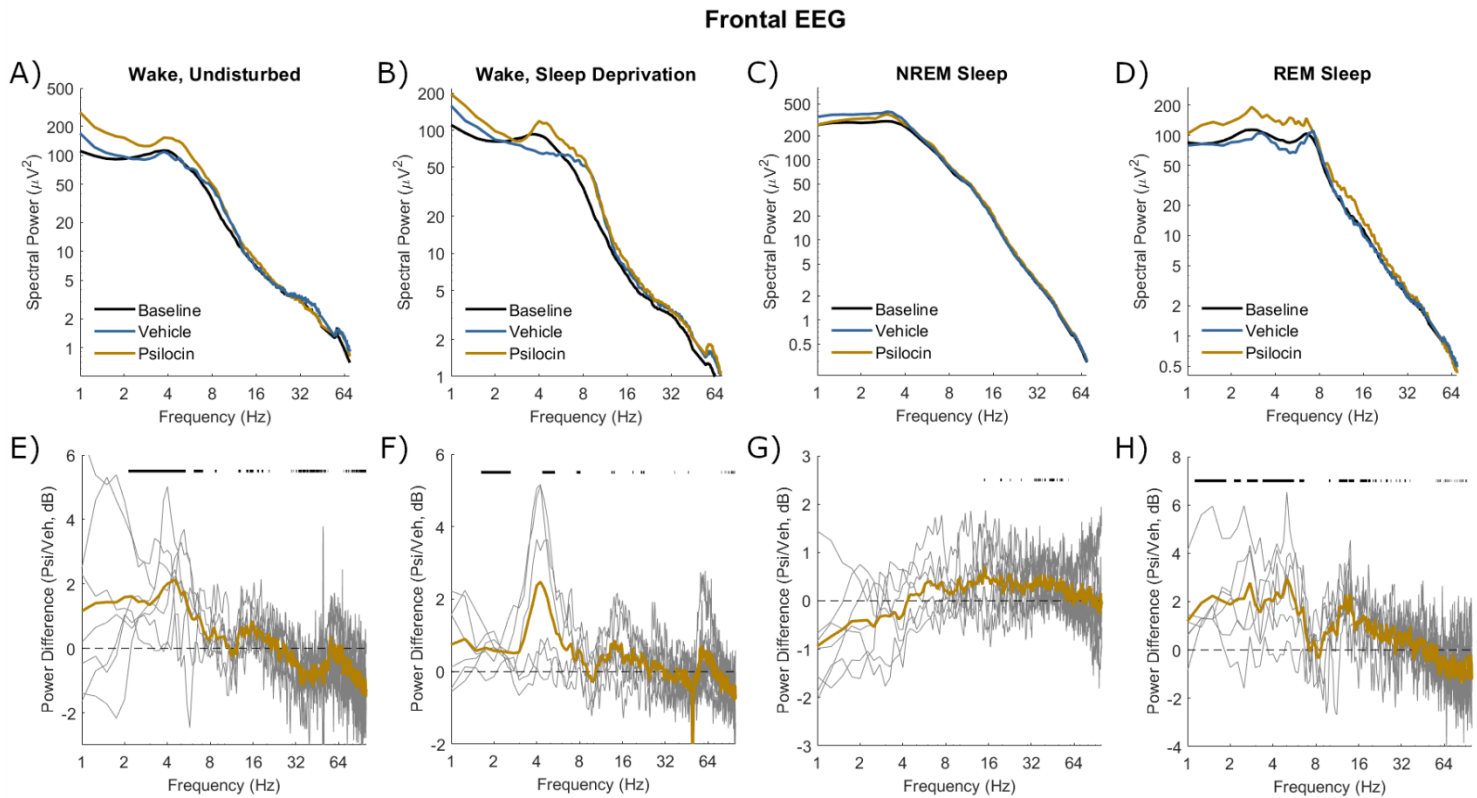

**Figure 5.** The mean power spectra of frontal EEG in four different vigilance state conditions following injection with vehicle (blue) and psilocin (yellow). **A)** ‘Wake, undisturbed’ corresponds to the first experiment, all wake epochs from injection until the first NREM episode at least 1-minute duration. **B)** ‘Wake, sleep deprivation’ corresponds to the first 30 minutes of sleep deprivation in the second experiment. **C)** ‘NREM sleep’ and **D)** ‘REM sleep’ correspond to the first experiment, all NREM/REM sleep epochs in the sleep period after injection, defined from the start of the first NREM sleep episode at least 1 minute duration until the next wake episode at least 5 minutes duration. Spectra averaged across the same vigilance state in the baseline day are shown for comparison (black). **E-H)** Below each plot illustrates the spectral power difference as a function of frequency in decibels between vehicle and psilocin conditions (positive is greater after psilocin). Grey lines correspond to individual animals and coloured lines to the mean. Black lines indicate discrete frequencies (at 0.25 Hz resolution) that were significantly different ( $p < 0.05$ ) according to paired t-tests.

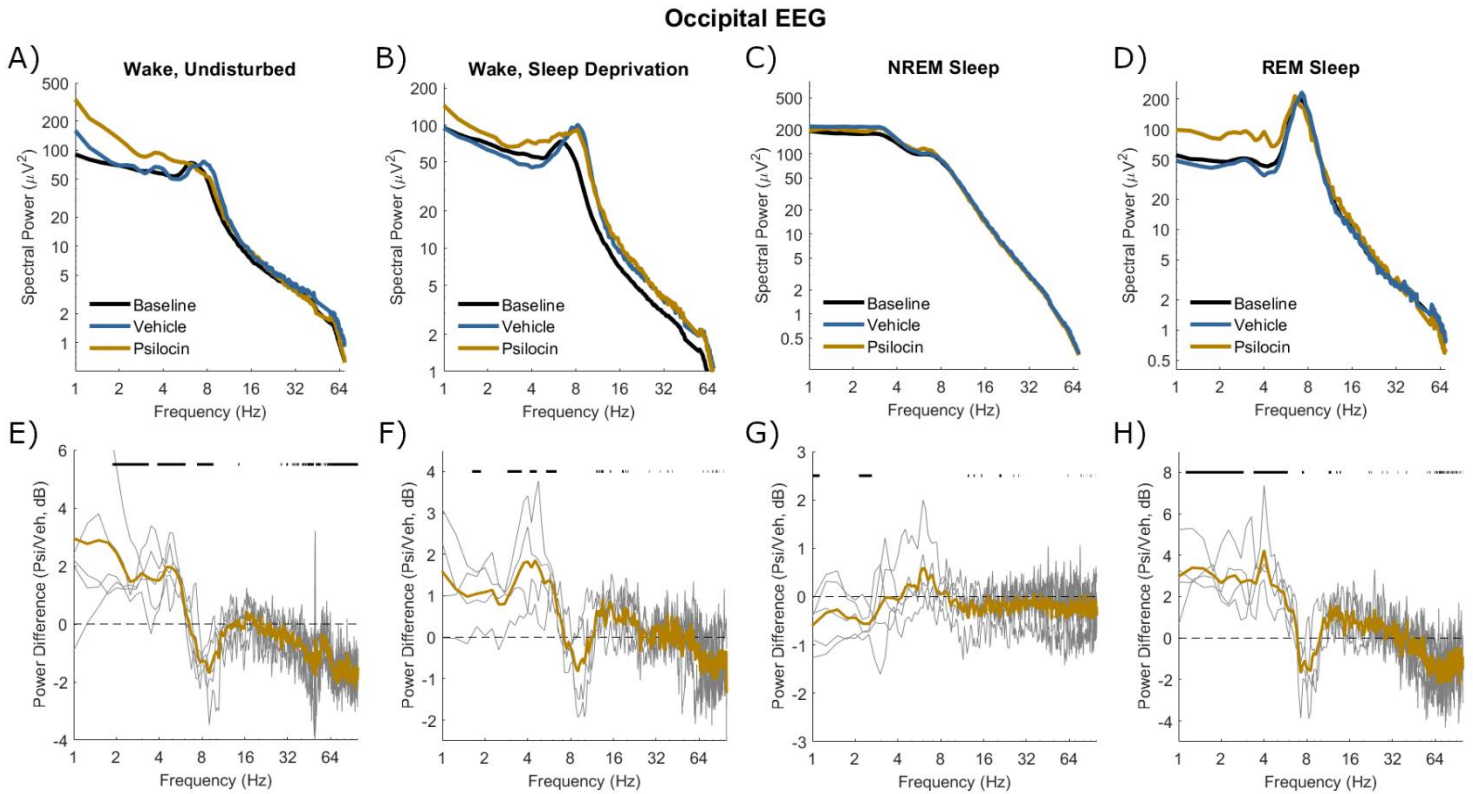

**Figure 6.** The mean power spectra of occipital EEG in four different vigilance state conditions following injection with vehicle (blue) and psilocin (yellow). **A)** 'Wake, undisturbed' corresponds to the first experiment, all wake epochs from injection until the first NREM episode at least 1-minute duration. **B)** 'Wake, sleep deprivation' corresponds to the first 30 minutes of sleep deprivation in the second experiment. **C)** 'NREM sleep' and **D)** 'REM sleep' correspond to the first experiment, all NREM/REM sleep epochs in the sleep period after injection, defined from the start of the first NREM sleep episode at least 1 minute duration until the next wake episode at least 5 minutes duration. Spectra averaged across the same vigilance state in the baseline day are shown for comparison (black). **E-H)** Below each plot illustrates the spectral power difference as a function of frequency in decibels between vehicle and psilocin conditions (positive is greater after psilocin). Grey lines correspond to individual animals and coloured lines to the mean. Black lines indicate discrete frequencies (at 0.25 Hz resolution) that were significantly different ( $p < 0.05$ ) according to paired t-tests.

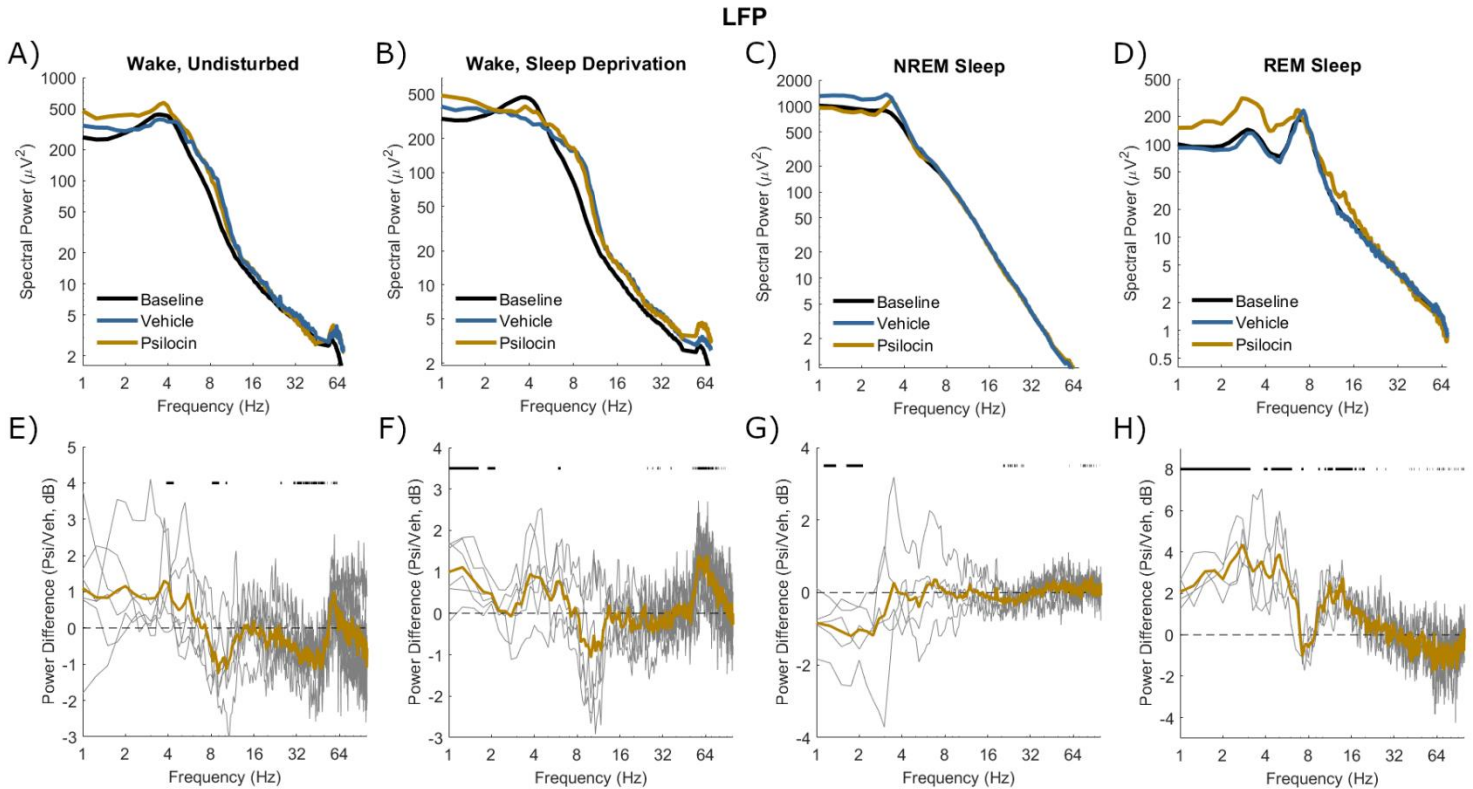

**Figure 7.** The mean power spectra of mean LFP in four different vigilance state conditions following injection with vehicle (blue) and psilocin (yellow). **A)** ‘Wake, undisturbed’ corresponds to the first experiment, all wake epochs from injection until the first NREM episode at least 1-minute duration. **B)** ‘Wake, sleep deprivation’ corresponds to the first 30 minutes of sleep deprivation in the second experiment. **C)** ‘NREM sleep’ and **D)** ‘REM sleep’ correspond to the first experiment, all NREM/REM sleep epochs in the sleep period after injection, defined from the start of the first NREM sleep episode at least 1 minute duration until the next wake episode at least 5 minutes duration. Spectra averaged across the same vigilance state in the baseline day are shown for comparison (black). **E-H)** Below each plot illustrates the spectral power difference as a function of frequency in decibels between vehicle and psilocin conditions (positive is greater after psilocin). Grey lines correspond to individual animals and coloured lines to the mean. Black lines indicate discrete frequencies (at 0.25 Hz resolution) that were significantly different ( $p < 0.05$ ) according to paired t-tests.
